# Supplementary material for: The coupling of tautomerization to hydration in the transition state on the pyrimidine photohydration reaction path
Source: Royal Society of Chemistry journal article supplement (doi:10.1039/c4cp02160f), 2014-08-01
Supplement: c4cp02160f1.pdf [file c4cp02160f1.pdf]

## Supporting Information for

### **The Coupling of Tautomerization to Hydration in the Transition State on the Pyrimidine Photohydration Reaction Path**

Stefan Franzen<sup>1</sup>, Bohdan Skalski<sup>2</sup>, Libero Bartolotti<sup>3</sup>, Bernard Delley<sup>4</sup>

<sup>1</sup> Department of Chemistry, North Carolina State University, Raleigh, NC 27695

<sup>2</sup> Faculty of Chemistry, Adam Mickiewicz University, Umultowska 89b, 61-614 Poznań, Poland

<sup>3</sup> Department of Chemistry, East Carolina University, Greenville, NC 27858, United States

<sup>4</sup> Paul-Scherer Institute, CH-5232, Villigen, Switzerland

## 1.0 Hydration of pyrimidines calculated using the NEB method

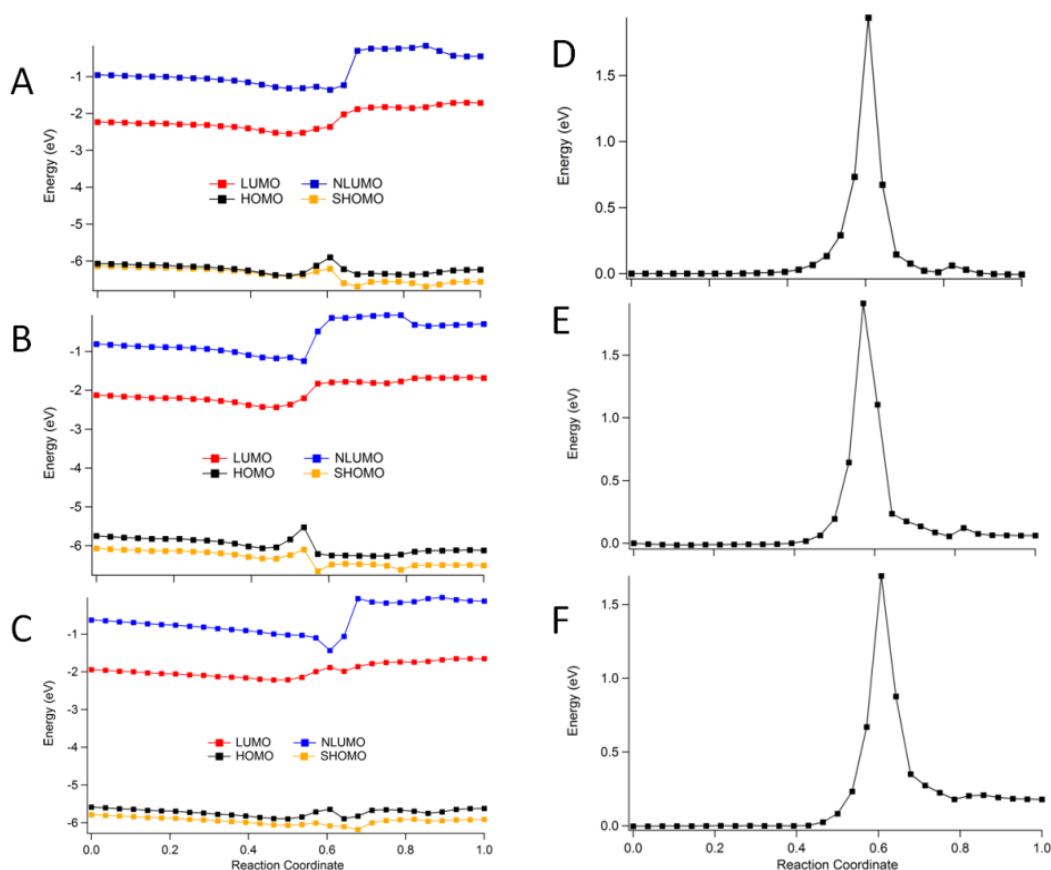

**Figure S1.** Nudged elastic band energies along the photohydration reaction coordinate for 1-methylpyrimidines. Molecular orbitals corresponding to the HOMO-1 (orange), HOMO (black), LUMO (red) and LUMO+1 (blue) are shown in the left panels A.) 1-MU B.) 1-MT and C.) 1-MC. The ground state energy along the reaction coordinate is shown in the right panels D.) 1-MU E.) 1-MT and F.) 1-MC.

### 1.1.1 1-methylcytosine NEB and DIMER calculations

Tables S1A, S1B and S1C provide the coordinates for the reactant, transition state and product for the hydration reaction of 1-methyl cytosine, respectively.

Table S1. 1-methylcytosine coordinates

Table S1A. Reactant (including H<sub>2</sub>O)

|    |   |        |        |       |
|----|---|--------|--------|-------|
| 1  | H | 1.982  | -3.621 | 7.534 |
| 2  | H | -2.666 | -3.032 | 6.492 |
| 3  | H | 1.815  | -1.854 | 7.823 |
| 4  | C | 1.869  | -2.639 | 7.054 |
| 5  | H | 2.717  | -2.455 | 6.388 |
| 6  | N | 0.662  | -2.613 | 6.227 |
| 7  | C | -0.549 | -2.854 | 6.782 |
| 8  | O | -0.503 | 0.043  | 8.122 |
| 9  | C | 0.787  | -2.276 | 4.818 |
| 10 | O | 1.903  | -2.047 | 4.361 |

|    |   |        |        |       |
|----|---|--------|--------|-------|
| 11 | N | -0.374 | -2.232 | 4.091 |
| 12 | C | -1.545 | -2.486 | 4.655 |
| 13 | N | -2.64  | -2.465 | 3.836 |
| 14 | C | -1.701 | -2.803 | 6.043 |
| 15 | H | 0.068  | 0.5    | 7.482 |
| 16 | H | -0.552 | -3.086 | 7.847 |
| 17 | H | -1.236 | -0.29  | 7.578 |
| 18 | H | -2.493 | -2.093 | 2.902 |
| 19 | H | -3.572 | -2.41  | 4.23  |

Table S1B. Transition state coordinates

|    |   |        |        |       |
|----|---|--------|--------|-------|
| 1  | H | 1.871  | -3.476 | 7.742 |
| 2  | H | -2.581 | -3.003 | 6.527 |
| 3  | H | 2.079  | -1.699 | 7.623 |
| 4  | C | 1.925  | -2.625 | 7.05  |
| 5  | H | 2.752  | -2.757 | 6.348 |
| 6  | N | 0.683  | -2.54  | 6.28  |
| 7  | C | -0.491 | -2.547 | 6.931 |
| 8  | O | -0.923 | -0.776 | 7.756 |
| 9  | C | 0.775  | -2.178 | 4.856 |
| 10 | O | 1.891  | -1.981 | 4.396 |
| 11 | N | -0.384 | -2.121 | 4.137 |
| 12 | C | -1.55  | -2.305 | 4.733 |
| 13 | N | -2.645 | -2.36  | 3.928 |
| 14 | C | -1.737 | -2.404 | 6.17  |
| 15 | H | -0.325 | -0.1   | 7.378 |
| 16 | H | -0.5   | -3.002 | 7.918 |
| 17 | H | -1.767 | -1.256 | 6.761 |
| 18 | H | -2.503 | -2.122 | 2.95  |
| 19 | H | -3.575 | -2.264 | 4.319 |

Table S1C. Photohydrate product coordinates

|    |   |        |        |       |
|----|---|--------|--------|-------|
| 1  | H | 1.659  | -3.214 | 7.944 |
| 2  | H | -1.892 | -3.766 | 6.176 |
| 3  | H | 2.112  | -1.539 | 7.486 |
| 4  | C | 1.811  | -2.528 | 7.098 |
| 5  | H | 2.626  | -2.894 | 6.465 |
| 6  | N | 0.597  | -2.473 | 6.292 |
| 7  | C | -0.645 | -2.199 | 6.972 |
| 8  | O | -0.88  | -0.8   | 7.236 |
| 9  | C | 0.732  | -2.275 | 4.903 |
| 10 | O | 1.844  | -2.271 | 4.377 |
| 11 | N | -0.431 | -2.103 | 4.141 |

|    |   |        |        |       |
|----|---|--------|--------|-------|
| 12 | C | -1.593 | -2.273 | 4.687 |
| 13 | N | -2.706 | -2.174 | 3.906 |
| 14 | C | -1.815 | -2.669 | 6.124 |
| 15 | H | -0.095 | -0.45  | 7.692 |
| 16 | H | -0.624 | -2.749 | 7.928 |
| 17 | H | -2.745 | -2.242 | 6.524 |
| 18 | H | -2.565 | -1.855 | 2.95  |
| 19 | H | -3.62  | -2.051 | 4.323 |

### 1.1.2 Cytosine vibrational wave numbers ( $\text{cm}^{-1}$ )

Tables S2 gives the eigenvalues for the vibrational frequency calculation of the three structures given in Tables S2A, S2B and S2C, respectively. While the reactant and product have six zero eigenvalues as expected for a structure that is at the optimum geometry, the saddle point has two negative eigenvalues. A single negative eigenvalue would be expected along the reaction coordinate. Section 1.1.3 shows that the first eigenvalue corresponds to the bond breaking and reforming coordinate, while the second eigenvalue is a methyl rotation.

Table S2. 1-methylcytosine vibrational wave numbers ( $\text{cm}^{-1}$ )

| Reactant | Saddle  | Product |
|----------|---------|---------|
| 0        | -1401.7 | 0       |
| 0        | -106.2  | 0       |
| 0        | 0       | 0       |
| 0        | 0       | 0       |
| 0        | 0       | 0       |
| 0        | 0       | 0       |
| 10.2     | 0       | 65.7    |
| 30       | 0       | 110.3   |
| 77.4     | 80.7    | 140     |
| 102.7    | 139.5   | 210.1   |
| 191      | 159.5   | 239.4   |
| 218.7    | 192.8   | 325.9   |
| 227.7    | 289.6   | 361     |
| 237.2    | 314.3   | 364     |
| 267.1    | 322.5   | 366.3   |
| 274.9    | 359.7   | 391     |
| 305.4    | 412.2   | 429.9   |
| 329.7    | 449.3   | 468.2   |
| 373.8    | 458.9   | 507.1   |
| 425.4    | 515     | 569.6   |
| 468.3    | 522.2   | 593.8   |
| 539.3    | 550.2   | 632.5   |
| 553.5    | 615.5   | 725.1   |

|        |        |        |
|--------|--------|--------|
| 596.4  | 633.3  | 760.6  |
| 712.5  | 697.7  | 772    |
| 720.2  | 735.3  | 848.6  |
| 753.8  | 758.7  | 895.8  |
| 761.3  | 777.4  | 955.2  |
| 776.8  | 865.3  | 993.1  |
| 932.8  | 911.1  | 1043.9 |
| 962.8  | 1020.3 | 1073.3 |
| 1027   | 1034.1 | 1139.8 |
| 1051.9 | 1054.6 | 1142   |
| 1136.6 | 1116   | 1162.7 |
| 1151.8 | 1128.4 | 1204.5 |
| 1195.7 | 1163.8 | 1242.9 |
| 1234.3 | 1245.3 | 1268.1 |
| 1327   | 1300   | 1286.6 |
| 1362.7 | 1355.9 | 1359.9 |
| 1399.7 | 1383.4 | 1396.3 |
| 1473.5 | 1390.7 | 1403.7 |
| 1487.9 | 1433.3 | 1406.2 |
| 1489.7 | 1479.4 | 1432.6 |
| 1523.4 | 1480.8 | 1473.8 |
| 1592.2 | 1496.4 | 1494.4 |
| 1642.5 | 1572.9 | 1571.5 |
| 1663.9 | 1606.1 | 1647.8 |
| 1702.9 | 1712   | 1688.1 |
| 3015.2 | 1753.8 | 2998.4 |
| 3114   | 2996.1 | 3003.9 |
| 3163   | 3093.4 | 3022.5 |
| 3182.3 | 3157.3 | 3075.6 |
| 3208.3 | 3181.9 | 3081.9 |
| 3526.9 | 3199.6 | 3139.3 |
| 3661.1 | 3513   | 3517.8 |
| 3695.6 | 3651   | 3654   |
| 3812.2 | 3670.1 | 3725.3 |

### ***1.1.3 1-methylcytosine hydrate eigenvector projections***

In this section we address existence of two negative eigenvalues in the Hessian calculated at the transition state. There are two modes with negative eigenvalues. Mode 1, the first and largest negative eigenvalue is a HO-H bond breaking and C-H bond forming coordinate, which corresponds to the transition state of the model system, ethene + H<sub>2</sub>O, system where there is a single negative eigenvalue at the transition state. The second negative eigenvalue in the cytosine system (mode 2) is shown to be a methyl rotation.

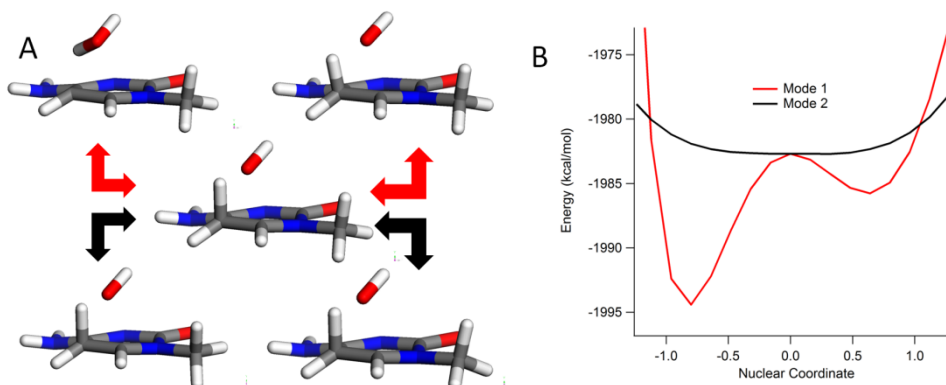

Figure S2. Eigenvector projections along the two negative eigenvalues calculated from the Hessian of the saddle point structure of 1-MC. A.) structures along each mode are shown using arrows that are colored to correspond to the potential surfaces. B.) potential energy surfaces for projections along mode 1 (red) and mode 2 (black). It is evident from inspection that mode 1 involves breaking of the O-H bond of H<sub>2</sub>O and formation of the C-H bond at the C5 position of cytosine.

### 1.2.1 1-Methyluracil NEB and DIMER calculation

Tables S3A, S3B and S3C provide the coordinates for the reactant, transition state and product of the hydration of 1-methyluracil, respectively.

Table S3. 1-methyluracil coordinates

Table S3A. Reactant (including H<sub>2</sub>O)

|    |   |        |        |        |
|----|---|--------|--------|--------|
| 1  | H | 2.021  | -1.107 | 1.48   |
| 2  | H | -2.688 | -0.528 | 0.511  |
| 3  | H | 1.728  | 0.628  | 1.873  |
| 4  | C | 1.856  | -0.104 | 1.065  |
| 5  | H | 2.71   | 0.174  | 0.44   |
| 6  | N | 0.663  | -0.1   | 0.213  |
| 7  | C | -0.575 | -0.332 | 0.761  |
| 8  | O | 0.259  | 2.711  | 2.206  |
| 9  | C | 0.816  | 0.172  | -1.159 |
| 10 | O | 1.9    | 0.4    | -1.685 |
| 11 | N | -0.381 | 0.162  | -1.863 |
| 12 | H | -0.294 | 0.344  | -2.862 |
| 13 | C | -1.692 | -0.082 | -1.385 |
| 14 | O | -2.648 | -0.065 | -2.157 |
| 15 | C | -1.726 | -0.337 | 0.041  |
| 16 | H | 0.513  | 3.283  | 1.462  |
| 17 | H | -0.567 | -0.514 | 1.836  |
| 18 | H | -0.675 | 2.929  | 2.359  |

Table S3B. Transition state coordinates

|   |   |        |        |        |
|---|---|--------|--------|--------|
| 1 | H | 1.939  | -0.974 | 0.694  |
| 2 | H | -2.595 | -0.597 | -0.432 |

|    |   |        |        |        |
|----|---|--------|--------|--------|
| 3  | H | 1.977  | 0.819  | 0.727  |
| 4  | C | 1.926  | -0.066 | 0.077  |
| 5  | H | 2.776  | -0.07  | -0.611 |
| 6  | N | 0.696  | -0.03  | -0.721 |
| 7  | C | -0.508 | -0.074 | -0.085 |
| 8  | O | -0.944 | 1.666  | 0.689  |
| 9  | C | 0.813  | 0.261  | -2.11  |
| 10 | O | 1.899  | 0.398  | -2.655 |
| 11 | N | -0.393 | 0.356  | -2.775 |
| 12 | H | -0.316 | 0.464  | -3.787 |
| 13 | C | -1.695 | 0.063  | -2.282 |
| 14 | O | -2.626 | -0.048 | -3.07  |
| 15 | C | -1.76  | -0.015 | -0.828 |
| 16 | H | -0.379 | 2.357  | 0.289  |
| 17 | H | -0.489 | -0.533 | 0.901  |
| 18 | H | -1.787 | 1.181  | -0.239 |

Table S3C. Photohydrate product coordinates

|    |   |        |        |        |
|----|---|--------|--------|--------|
| 1  | H | 1.683  | -0.751 | 1.9    |
| 2  | C | -1.84  | -1.38  | 0.162  |
| 3  | H | 1.996  | 0.98   | 1.541  |
| 4  | C | 1.788  | -0.008 | 1.097  |
| 5  | H | 2.638  | -0.276 | 0.462  |
| 6  | N | 0.581  | -0.005 | 0.278  |
| 7  | C | -0.691 | 0.264  | 0.938  |
| 8  | O | -0.947 | 1.662  | 1.127  |
| 9  | C | 0.73   | 0.214  | -1.083 |
| 10 | O | 1.81   | 0.302  | -1.657 |
| 11 | N | -0.474 | 0.303  | -1.805 |
| 12 | H | -0.356 | 0.483  | -2.801 |
| 13 | C | -1.769 | 0.101  | -1.344 |
| 14 | O | -2.737 | 0.175  | -2.087 |
| 15 | C | -1.847 | -0.281 | 0.117  |
| 16 | H | -0.231 | 2.034  | 1.67   |
| 17 | H | -0.646 | -0.248 | 1.913  |
| 18 | H | -2.802 | 0.073  | 0.52   |

### 1.2.2 1-methyluracil hydrate vibrational wave numbers ( $\text{cm}^{-1}$ )

Table S4 gives the eigenvalues for the vibrational frequency calculation of the three sets of coordinates given in Tables S4A, S4B and S4C, respectively.

Table S4. 1-methyluracil hydrate vibrational wave numbers ( $\text{cm}^{-1}$ )

| Reactant | Saddle  | Final  |
|----------|---------|--------|
| 0        | -1564.7 | 0      |
| 0        | 0       | 0      |
| 0        | 0       | 0      |
| 0        | 0       | 0      |
| 0        | 0       | 0      |
| 0        | 0       | 0      |
| 42.4     | 0       | 88.9   |
| 43.3     | 88.6    | 110.2  |
| 84.1     | 117.8   | 133.5  |
| 123      | 133.7   | 190.4  |
| 169.8    | 158.2   | 290.8  |
| 248.3    | 174.9   | 318.5  |
| 273.9    | 277.9   | 342.9  |
| 332      | 336.9   | 374.3  |
| 345.7    | 371.9   | 375.6  |
| 357.5    | 418     | 423.2  |
| 379.8    | 452.4   | 484    |
| 384.3    | 467.1   | 536    |
| 428.6    | 511.2   | 545.9  |
| 455      | 537.8   | 600.1  |
| 531.7    | 600.2   | 642.9  |
| 604.7    | 629.2   | 717.9  |
| 678.4    | 676.6   | 750.7  |
| 733.5    | 712.7   | 774.2  |
| 744.2    | 739.2   | 846.4  |
| 757.7    | 767.2   | 919.8  |
| 783.1    | 789.6   | 942.9  |
| 839.9    | 849.4   | 1004.3 |
| 954.3    | 931.6   | 1052.2 |
| 966.8    | 1009.9  | 1142.6 |
| 1006.5   | 1065.7  | 1151.9 |
| 1125.9   | 1088.1  | 1177   |
| 1153.8   | 1136.7  | 1193.4 |
| 1169.4   | 1175.2  | 1223.1 |
| 1210.8   | 1184.7  | 1254.7 |
| 1311.8   | 1302.2  | 1288.4 |
| 1343.4   | 1319.5  | 1323.4 |
| 1375     | 1369.2  | 1357.9 |
| 1413.1   | 1377.8  | 1382.5 |
| 1429.6   | 1394.7  | 1394   |
| 1478.7   | 1413.8  | 1415.3 |
| 1525.9   | 1446.8  | 1439.7 |



|        |        |        |
|--------|--------|--------|
| 1638.6 | 1480.7 | 1480.5 |
| 1665.1 | 1493.2 | 1509   |
| 1738.9 | 1663.7 | 1712.4 |
| 1764   | 1735   | 1728.4 |
| 3039.2 | 1757.5 | 3016.2 |
| 3122   | 3033   | 3021.8 |
| 3162.3 | 3115.2 | 3027.6 |
| 3176   | 3140.5 | 3098.3 |
| 3225.6 | 3157.8 | 3103   |
| 3535.3 | 3172   | 3153   |
| 3705.1 | 3533.8 | 3522.1 |
| 3819.6 | 3652.1 | 3717.4 |

### 1.2.3 1-methyluracil hydrate eigenvector projections

There is a single negative eigenvalue in the Hessian of 1-methyluracil hydrate. The eigenvector projections shown in Figure 3 of the text verify that the coordinate corresponds to the bond breaking of an O-H bond on H<sub>2</sub>O and simultaneous bond formation on the C5 carbon of uracil. These are analogous to the figures shown here for cytosine and thymine (Figures S2 and S3, respectively).

### 1.3.1 1-methylthymine NEB and DIMER calculation

Table S5. 1-methylthymine coordinates

Table S5A. Reactant coordinates (including H<sub>2</sub>O)

|    |   |        |        |       |
|----|---|--------|--------|-------|
| 1  | H | 2.105  | -3.587 | 7.453 |
| 2  | C | -2.997 | -3.086 | 6.638 |
| 3  | H | 1.801  | -1.855 | 7.847 |
| 4  | C | 1.938  | -2.583 | 7.037 |
| 5  | H | 2.796  | -2.302 | 6.419 |
| 6  | N | 0.754  | -2.583 | 6.175 |
| 7  | C | -0.491 | -2.812 | 6.718 |
| 8  | O | 0.260  | 0.211  | 8.208 |
| 9  | C | 0.917  | -2.317 | 4.809 |
| 10 | O | 2.002  | -2.090 | 4.282 |
| 11 | N | -0.279 | -2.327 | 4.103 |
| 12 | H | -0.191 | -2.146 | 3.103 |
| 13 | C | -1.587 | -2.566 | 4.575 |
| 14 | O | -2.540 | -2.543 | 3.795 |
| 15 | C | -1.654 | -2.823 | 6.011 |
| 16 | H | 0.517  | 0.780  | 7.463 |
| 17 | H | -0.481 | -2.986 | 7.794 |
| 18 | H | -0.673 | 0.431  | 8.360 |
| 19 | H | -3.784 | -2.858 | 5.909 |
| 20 | H | -3.159 | -2.467 | 7.534 |

|    |   |        |        |       |
|----|---|--------|--------|-------|
| 21 | H | -3.110 | -4.142 | 6.930 |
|----|---|--------|--------|-------|

Table S5B. Transition state coordinates

|    |   |        |        |       |
|----|---|--------|--------|-------|
| 1  | H | 2.097  | -3.361 | 7.669 |
| 2  | C | -2.721 | -3.548 | 6.581 |
| 3  | H | 2.095  | -1.569 | 7.691 |
| 4  | C | 2.075  | -2.459 | 7.046 |
| 5  | H | 2.937  | -2.446 | 6.374 |
| 6  | N | 0.858  | -2.463 | 6.228 |
| 7  | C | -0.352 | -2.624 | 6.828 |
| 8  | O | -0.959 | -0.93  | 7.655 |
| 9  | C | 0.977  | -2.073 | 4.865 |
| 10 | O | 2.058  | -1.809 | 4.357 |
| 11 | N | -0.22  | -2.035 | 4.181 |
| 12 | H | -0.141 | -1.843 | 3.182 |
| 13 | C | -1.498 | -2.477 | 4.624 |
| 14 | O | -2.398 | -2.623 | 3.804 |
| 15 | C | -1.603 | -2.65  | 6.074 |
| 16 | H | -0.437 | -0.177 | 7.312 |
| 17 | H | -0.318 | -3.103 | 7.805 |
| 18 | H | -1.71  | -1.464 | 6.659 |
| 19 | H | -3.619 | -3.376 | 5.976 |
| 20 | H | -2.964 | -3.33  | 7.63  |
| 21 | H | -2.46  | -4.615 | 6.496 |

Table S5C. Photohydrate product coordinates

|    |   |        |        |       |
|----|---|--------|--------|-------|
| 1  | H | 1.639  | -3.128 | 7.965 |
| 2  | C | -1.966 | -4.232 | 6.192 |
| 3  | H | 2.083  | -1.456 | 7.486 |
| 4  | C | 1.808  | -2.457 | 7.113 |
| 5  | H | 2.643  | -2.828 | 6.511 |
| 6  | N | 0.609  | -2.43  | 6.279 |
| 7  | C | -0.673 | -2.159 | 6.917 |
| 8  | O | -0.923 | -0.76  | 7.107 |
| 9  | C | 0.785  | -2.203 | 4.925 |
| 10 | O | 1.876  | -2.11  | 4.372 |
| 11 | N | -0.406 | -2.114 | 4.183 |
| 12 | H | -0.276 | -1.905 | 3.194 |
| 13 | C | -1.709 | -2.304 | 4.623 |
| 14 | O | -2.662 | -2.214 | 3.861 |
| 15 | C | -1.832 | -2.702 | 6.084 |
| 16 | H | -0.217 | -0.397 | 7.668 |
| 17 | H | -0.645 | -2.674 | 7.891 |

|    |   |        |        |       |
|----|---|--------|--------|-------|
| 18 | H | -2.751 | -2.227 | 6.451 |
| 19 | H | -2.795 | -4.579 | 5.562 |
| 20 | H | -2.174 | -4.527 | 7.231 |
| 21 | H | -1.043 | -4.734 | 5.866 |

### 1.3.2 1-methylthymine hydrate vibrational wave numbers ( $\text{cm}^{-1}$ )

Table S6 gives the eigenvalues for the vibrational frequency calculation of the three sets of coordinates given in Tables S6A, S6B and S6C, respectively.

Table S6. 1-methylthymine hydrate vibrational wave numbers ( $\text{cm}^{-1}$ )

| Initial | Saddle  | Final  |
|---------|---------|--------|
| 0       | -1533.8 | 0      |
| 0       | -65     | 0      |
| 0       | 0       | 0      |
| 0       | 0       | 0      |
| 0       | 0       | 0      |
| 0       | 0       | 0      |
| 65.3    | 0       | 65.3   |
| 91.6    | 0       | 91.6   |
| 109.3   | 84.5    | 109.3  |
| 172.8   | 104.1   | 172.8  |
| 206.6   | 132.5   | 206.6  |
| 251.7   | 164.1   | 251.7  |
| 273.3   | 172.1   | 273.3  |
| 311.4   | 229.8   | 311.4  |
| 346.8   | 263.6   | 346.8  |
| 363.2   | 284.7   | 363.2  |
| 372.7   | 348     | 372.7  |
| 420     | 381.8   | 420    |
| 438.5   | 408.5   | 438.5  |
| 507.8   | 433.3   | 507.8  |
| 548.9   | 462.8   | 548.9  |
| 600.4   | 490.1   | 600.4  |
| 649.1   | 552.2   | 649.1  |
| 703.8   | 615     | 703.8  |
| 726.9   | 636.4   | 726.9  |
| 740.4   | 675.1   | 740.4  |
| 777.1   | 694.5   | 777.1  |
| 863.6   | 734     | 863.6  |
| 928     | 764.3   | 928    |
| 974.6   | 779.3   | 974.6  |
| 1002.5  | 847     | 1002.5 |

|        |        |        |
|--------|--------|--------|
| 1033.1 | 954.6  | 1033.1 |
| 1088.6 | 1012.3 | 1088.6 |
| 1103.3 | 1042.7 | 1103.3 |
| 1117.9 | 1055.5 | 1117.9 |
| 1152   | 1107.2 | 1152   |
| 1174.1 | 1110.6 | 1174.1 |
| 1235.4 | 1172.1 | 1235.4 |
| 1252.2 | 1202.8 | 1252.2 |
| 1264.8 | 1257.9 | 1264.8 |
| 1294   | 1314   | 1294   |
| 1339.4 | 1343.2 | 1339.4 |
| 1365.1 | 1351.4 | 1365.1 |
| 1372.7 | 1366.1 | 1372.7 |
| 1402.4 | 1399.2 | 1402.4 |
| 1409.6 | 1408.3 | 1409.6 |
| 1450.2 | 1438.9 | 1450.2 |
| 1466.7 | 1451.2 | 1466.7 |
| 1468.2 | 1465.3 | 1468.2 |
| 1510.6 | 1478.4 | 1510.6 |
| 1514.9 | 1502.7 | 1514.9 |
| 1709.1 | 1656.3 | 1709.1 |
| 1728.5 | 1735.6 | 1728.5 |
| 2996.5 | 1745.1 | 2996.5 |
| 3009.5 | 3004.7 | 3009.5 |
| 3025.9 | 3065.2 | 3025.9 |
| 3071.1 | 3078.2 | 3071.1 |
| 3102.7 | 3097.7 | 3102.7 |
| 3108   | 3148.6 | 3108   |
| 3139.9 | 3181.3 | 3139.9 |
| 3167.9 | 3192.5 | 3167.9 |
| 3519.9 | 3506   | 3519.9 |
| 3713.2 | 3675.6 | 3713.2 |

### 1.3.3 1-methylthymine hydrate eigenvector projections

Figure S3 shows the similarity of the two negative eigenvalues in the Hessian calculated at the transition state of the 1-MT to those in 1-MC. There are two modes with negative eigenvalues. Mode 1, the first and largest negative eigenvalue is a HO-H bond breaking and C-H bond forming coordinate, which corresponds to the transition state of the model system, ethene + H<sub>2</sub>O, system where there is a single negative eigenvalue at the transition state. The second negative eigenvalue in the cytosine system (mode 2) is shown to be a methyl rotation. As shown in Figure 3 of the text 1-MU resembles the ethene case in having a single negative eigenvalue. As discussed in the text the methyl rotation can be projected out by finding a local maximum or minimum. This coordinate is not along the transition state and thus it does not interfere with the conclusions drawn here. However, if one wishes to calculate a rate constant using statistical mechanical methods, one

must absolutely project out the methyl rotation to prevent it from given a spurious contribution to the barrier height.

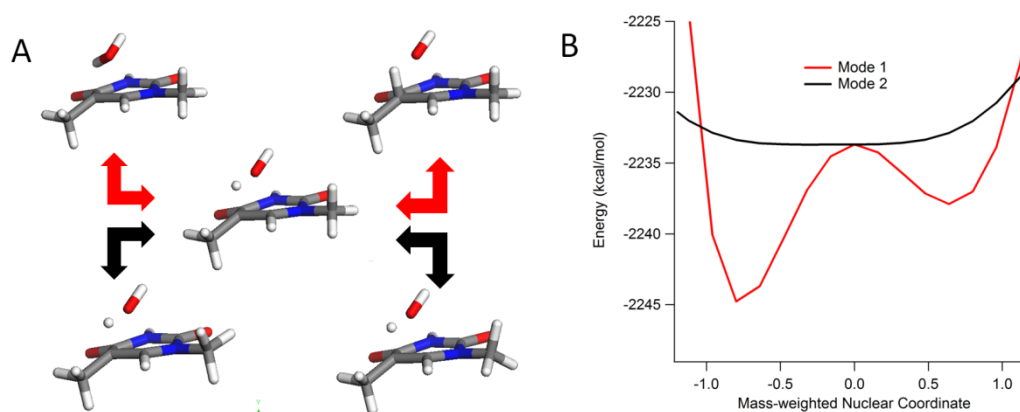

Figure S3. Eigenvector projections along the two negative eigenvalues calculated from the Hessian of the saddle point structure. A.) structures along each mode are shown using arrows that are colored to correspond to the potential surfaces. B.) potential energy surfaces for projections along mode 1 (red) and mode 2 (black). It is evident from inspection that mode 1 involves breaking of the O-H bond of H<sub>2</sub>O and formation of the C-H bond at the C5 position of thymine.

The transition state was also validated using a calculation of the intrinsic reaction coordinate (IRC). The IRC trajectories are shown in Figure S4.

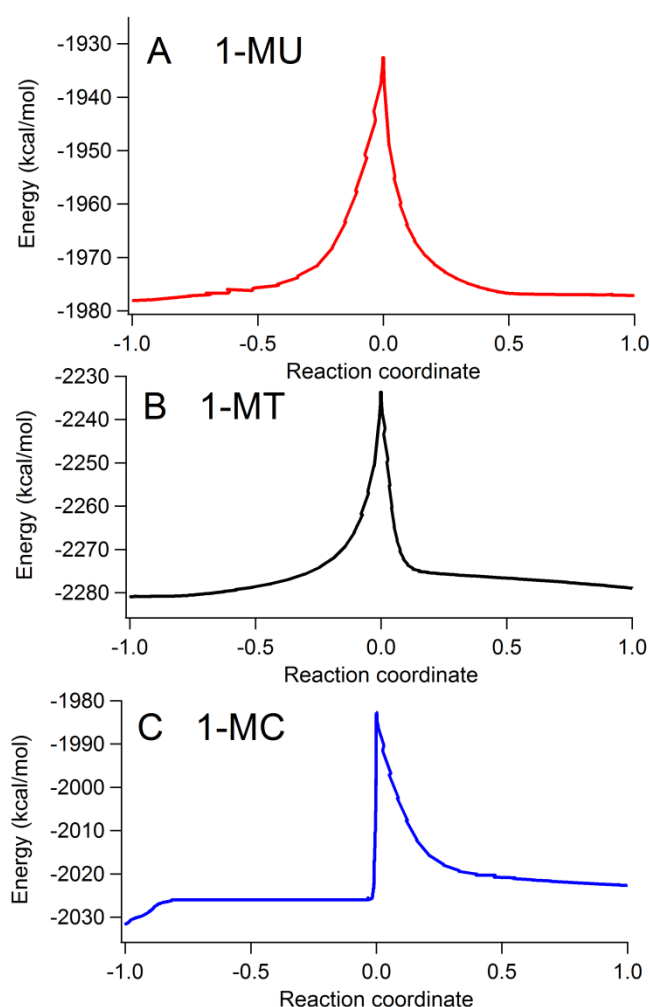

Figure S4. The energy profile of the IRC calculation for 1-methylcytosine, thymine and uracil.

The projected structures using the IRC method are compared to the starting structures for the geometry optimized reactant and product in Figures S5, S6 and S7 for cytosine, thymidine and uracil, respectively..

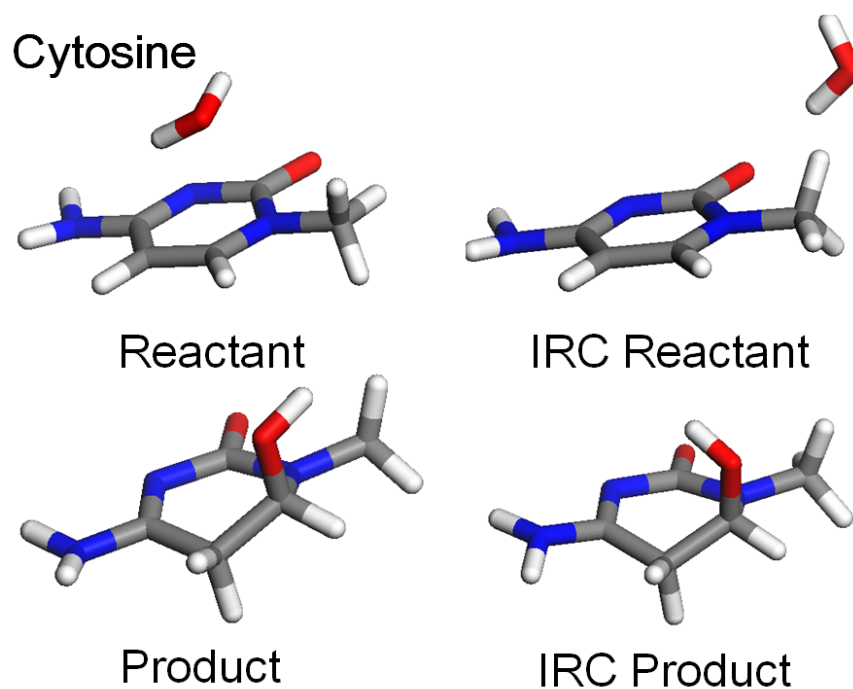

Figure S5. Comparison of the structures for 1-methylcytosine of the geometry optimized reactant and product (left) with the structures obtained using a IRC projection from the transition state (right).

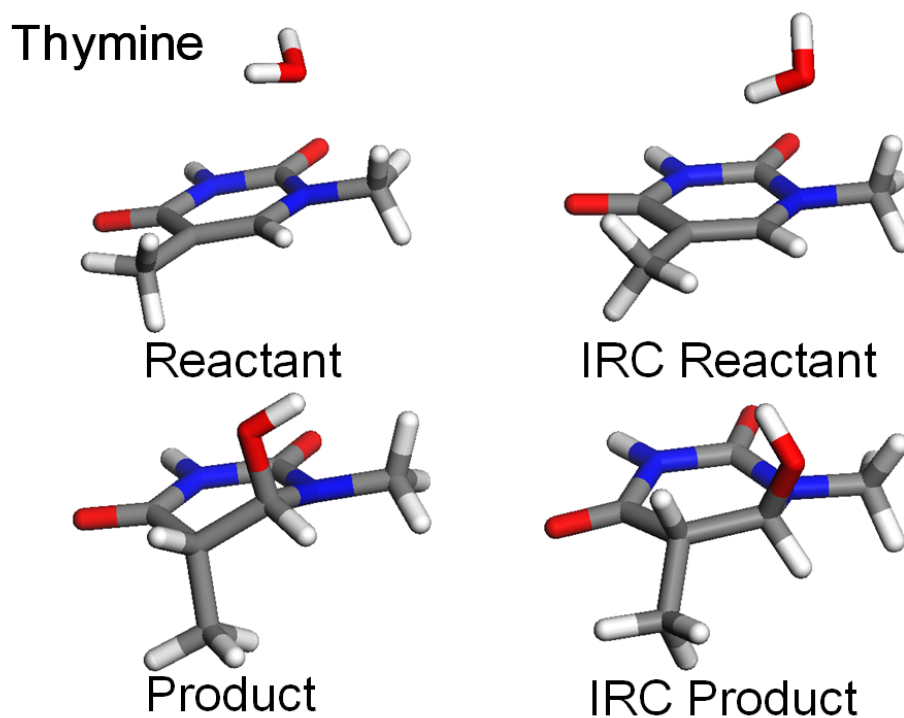

Figure S6. Comparison of the structures for 1-methylthymine of the geometry optimized reactant and product (left) with the structures obtained using a IRC projection from the transition state (right).

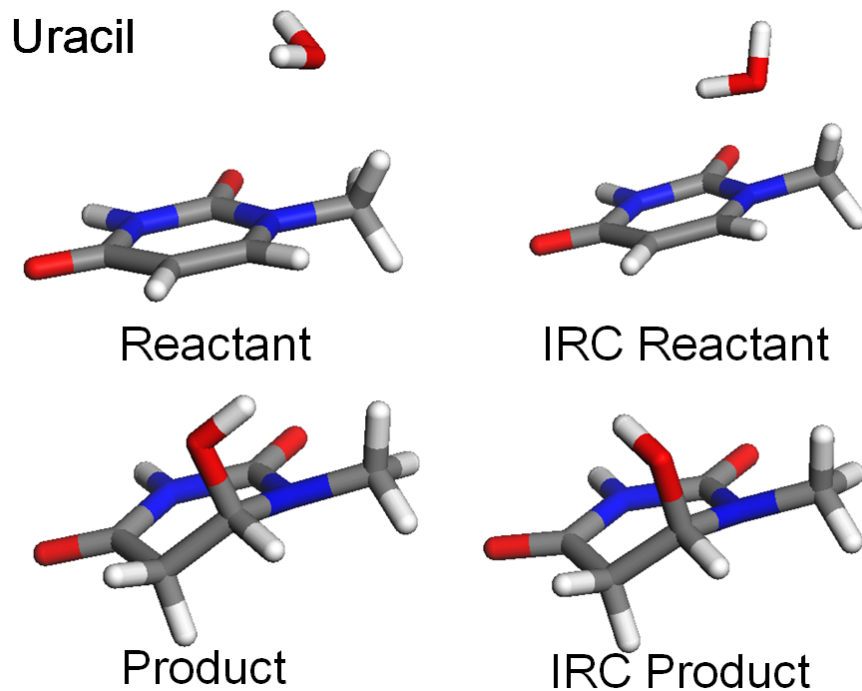

Figure S7. Comparison of the structures for 1-methyluracil of the geometry optimized reactant and product (left) with the structures obtained using a IRC projection from the transition state (right).

## 2.0 Hydration of pyrimidine tautomers calculated using the NEB method

In this section we report the coordinates and frequencies for the tautomers of the three 1-methylpyridimindines.

Table S7. 1-methyluracil(t) coordinates

Table S7A Reactant coordinates

|    |   |        |        |        |
|----|---|--------|--------|--------|
| 1  | H | 1.9    | -1.548 | 1.42   |
| 2  | H | -2.597 | -0.743 | 0.254  |
| 3  | H | 2.047  | 0.236  | 1.455  |
| 4  | C | 1.953  | -0.642 | 0.802  |
| 5  | H | 2.809  | -0.697 | 0.124  |
| 6  | N | 0.746  | -0.538 | -0.022 |
| 7  | C | -0.474 | -0.72  | 0.535  |
| 8  | O | 0.266  | 2.077  | 1.97   |
| 9  | C | 0.885  | -0.156 | -1.413 |
| 10 | O | 2.007  | 0.097  | -1.85  |
| 11 | N | -0.271 | -0.101 | -2.155 |
| 12 | C | -1.433 | -0.303 | -1.588 |
| 13 | O | -2.508 | -0.198 | -2.423 |
| 14 | C | -1.621 | -0.602 | -0.208 |
| 15 | H | 0.376  | 2.357  | 1.045  |
| 16 | H | -0.489 | -0.947 | 1.6    |
| 17 | H | -0.275 | 2.781  | 2.364  |
| 18 | H | -3.32  | -0.353 | -1.91  |

Table S7B Transition state coordinates

|    |   |        |        |        |
|----|---|--------|--------|--------|
| 1  | H | 2.024  | -1.185 | 1.677  |
| 2  | H | -2.339 | -0.826 | 0.332  |
| 3  | H | 2.48   | 0.5    | 1.278  |
| 4  | C | 2.171  | -0.468 | 0.859  |
| 5  | H | 2.95   | -0.817 | 0.177  |
| 6  | N | 0.919  | -0.335 | 0.113  |
| 7  | C | -0.255 | -0.35  | 0.769  |
| 8  | O | -0.689 | 1.352  | 1.619  |
| 9  | C | 1.013  | 0.055  | -1.298 |
| 10 | O | 2.127  | 0.261  | -1.753 |
| 11 | N | -0.151 | 0.126  | -2.022 |
| 12 | C | -1.296 | -0.061 | -1.429 |
| 13 | O | -2.376 | -0.045 | -2.245 |
| 14 | C | -1.501 | -0.206 | -0.004 |
| 15 | H | -0.09  | 2.039  | 1.265  |
| 16 | H | -0.267 | -0.856 | 1.733  |
| 17 | H | -1.539 | 0.936  | 0.631  |
| 18 | H | -3.181 | -0.12  | -1.703 |

Table S7C. Photohydrate product coordinates

|    |   |        |        |        |
|----|---|--------|--------|--------|
| 1  | H | 1.944  | -0.956 | 1.819  |
| 2  | H | -1.588 | -1.516 | -0.058 |
| 3  | H | 2.432  | 0.7    | 1.333  |
| 4  | C | 2.117  | -0.29  | 0.962  |
| 5  | H | 2.926  | -0.681 | 0.339  |
| 6  | N | 0.903  | -0.217 | 0.155  |
| 7  | C | -0.346 | 0.007  | 0.842  |
| 8  | O | -0.595 | 1.387  | 1.178  |
| 9  | C | 1.045  | 0.071  | -1.212 |
| 10 | O | 2.156  | 0.117  | -1.736 |
| 11 | N | -0.121 | 0.281  | -1.975 |
| 12 | C | -1.266 | 0.064  | -1.449 |
| 13 | O | -2.354 | 0.246  | -2.244 |
| 14 | C | -1.506 | -0.418 | -0.046 |
| 15 | H | 0.178  | 1.718  | 1.667  |
| 16 | H | -0.33  | -0.598 | 1.766  |
| 17 | H | -2.436 | -0.009 | 0.376  |
| 18 | H | -3.159 | 0.093  | -1.717 |

Table S8. 1-methyluracil(t) vibrational wave numbers ( $\text{cm}^{-1}$ )



| Reactant | Saddle  | Product |
|----------|---------|---------|
| 0        | -1440.6 | 0       |
| 0        | 0       | 0       |
| 0        | 0       | 0       |
| 0        | 0       | 0       |
| 0        | 0       | 0       |
| 0        | 0       | 0       |
| 24.5     | 0       | 67.9    |
| 92.7     | 88.7    | 114.4   |
| 114      | 142.6   | 130.9   |
| 150.9    | 164.2   | 148.6   |
| 188.5    | 202.5   | 212.5   |
| 252.8    | 213.4   | 338.6   |
| 265.9    | 298.7   | 358.9   |
| 307.4    | 343.2   | 376.8   |
| 347.6    | 377.5   | 381.6   |
| 381.5    | 440.4   | 426.7   |
| 433.8    | 462.1   | 441.4   |
| 439.6    | 465.6   | 486     |
| 453      | 496.1   | 541.8   |
| 478.4    | 537.4   | 565.6   |
| 568.8    | 546     | 602.5   |
| 608.9    | 634.1   | 725.4   |
| 643.3    | 650.1   | 760.2   |
| 716      | 705.5   | 773.3   |
| 750.9    | 756.1   | 871.1   |
| 767.3    | 759.6   | 935.1   |
| 776.8    | 789.7   | 972.2   |
| 783.9    | 861.3   | 1015.7  |
| 966      | 925.2   | 1046.9  |
| 973.7    | 1010.7  | 1111    |
| 1064.3   | 1033.6  | 1126.3  |
| 1097.7   | 1112.4  | 1177.1  |
| 1150.5   | 1129    | 1183.6  |
| 1174     | 1139.9  | 1220.6  |
| 1210.3   | 1162.2  | 1250.4  |
| 1254.5   | 1225.7  | 1281.5  |
| 1328.7   | 1283.1  | 1293.1  |
| 1368.5   | 1336.8  | 1359.5  |
| 1419.7   | 1364.3  | 1369.3  |
| 1449.4   | 1403.3  | 1417.1  |
| 1505.9   | 1434.8  | 1428.5  |

|        |        |        |
|--------|--------|--------|
| 1512   | 1445.4 | 1443.6 |
| 1583   | 1469.5 | 1463   |
| 1675.7 | 1491.3 | 1476.4 |
| 1684.2 | 1601.3 | 1685.7 |
| 1713.6 | 1699.6 | 1719.3 |
| 3048.9 | 1723.3 | 3009.4 |
| 3139.3 | 3037.2 | 3013   |
| 3164.9 | 3115   | 3033.6 |
| 3186.7 | 3140.1 | 3070.5 |
| 3202.4 | 3150.6 | 3088.8 |
| 3511.4 | 3189.2 | 3131.7 |
| 3709.7 | 3638.9 | 3703.7 |
| 3794.7 | 3675.4 | 3724.9 |

Table S9. 1-methylthymidine(t) coordinates

Table S9A Reactant coordinates

|    |   |        |        |        |
|----|---|--------|--------|--------|
| 1  | H | 2.672  | -1.344 | 1.095  |
| 2  | C | -2.49  | -0.744 | 0.31   |
| 3  | H | 2.288  | 0.335  | 1.598  |
| 4  | C | 2.444  | -0.329 | 0.739  |
| 5  | H | 3.27   | 0.03   | 0.118  |
| 6  | N | 1.245  | -0.331 | -0.104 |
| 7  | C | 0.023  | -0.531 | 0.449  |
| 8  | O | 0.76   | 2.373  | 1.982  |
| 9  | C | 1.39   | -0.074 | -1.519 |
| 10 | O | 2.504  | 0.186  | -1.974 |
| 11 | N | 0.24   | -0.131 | -2.27  |
| 12 | C | -0.915 | -0.362 | -1.703 |
| 13 | O | -1.977 | -0.399 | -2.561 |
| 14 | C | -1.128 | -0.559 | -0.3   |
| 15 | H | 1.126  | 2.712  | 1.148  |
| 16 | H | 0.008  | -0.657 | 1.532  |
| 17 | H | -0.11  | 2.801  | 2.045  |
| 18 | H | -3.161 | 0.106  | 0.098  |
| 19 | H | -2.42  | -0.823 | 1.403  |
| 20 | H | -2.987 | -1.665 | -0.04  |
| 21 | H | -2.783 | -0.593 | -2.048 |

Table S9B. Transition state coordinates

|    |   |        |        |        |
|----|---|--------|--------|--------|
| 1  | H | 2.526  | -0.822 | 1.611  |
| 2  | C | -2.167 | -1.094 | 0.3    |
| 3  | H | 2.771  | 0.929  | 1.326  |
| 4  | C | 2.609  | -0.045 | 0.843  |
| 5  | H | 3.449  | -0.249 | 0.175  |
| 6  | N | 1.377  | -0.022 | 0.049  |
| 7  | C | 0.189  | -0.178 | 0.658  |
| 8  | O | -0.446 | 1.469  | 1.551  |
| 9  | C | 1.472  | 0.447  | -1.337 |
| 10 | O | 2.572  | 0.783  | -1.747 |
| 11 | N | 0.325  | 0.445  | -2.086 |
| 12 | C | -0.811 | 0.103  | -1.545 |
| 13 | O | -1.855 | 0.049  | -2.407 |
| 14 | C | -1.056 | -0.142 | -0.134 |
| 15 | H | 0.094  | 2.228  | 1.252  |
| 16 | H | 0.2    | -0.694 | 1.616  |
| 17 | H | -1.196 | 0.985  | 0.492  |
| 18 | H | -3.16  | -0.757 | -0.036 |
| 19 | H | -2.224 | -1.127 | 1.396  |
| 20 | H | -2.011 | -2.121 | -0.067 |
| 21 | H | -2.659 | -0.187 | -1.91  |

S9C. Photohydrate product coordinates

|    |   |        |        |        |
|----|---|--------|--------|--------|
| 1  | H | 2.184  | -0.535 | 1.858  |
| 2  | C | -1.412 | -1.624 | 0.022  |
| 3  | H | 2.657  | 1.117  | 1.35   |
| 4  | C | 2.355  | 0.118  | 0.991  |
| 5  | H | 3.172  | -0.275 | 0.38   |
| 6  | N | 1.152  | 0.17   | 0.167  |
| 7  | C | -0.11  | 0.415  | 0.821  |
| 8  | O | -0.385 | 1.806  | 1.075  |
| 9  | C | 1.306  | 0.308  | -1.221 |
| 10 | O | 2.414  | 0.238  | -1.748 |
| 11 | N | 0.15   | 0.522  | -1.997 |
| 12 | C | -1.002 | 0.366  | -1.462 |
| 13 | O | -2.084 | 0.588  | -2.256 |
| 14 | C | -1.262 | -0.095 | -0.047 |
| 15 | H | 0.379  | 2.178  | 1.549  |
| 16 | H | -0.096 | -0.139 | 1.777  |
| 17 | H | -2.177 | 0.388  | 0.333  |
| 18 | H | -2.237 | -1.972 | -0.613 |
| 19 | H | -1.623 | -1.935 | 1.056  |

|    |   |        |        |        |
|----|---|--------|--------|--------|
| 20 | H | -0.489 | -2.119 | -0.311 |
| 21 | H | -2.893 | 0.48   | -1.724 |

Table S10. 1-methylthymine(t) vibrational wave numbers (cm<sup>-1</sup>)

| Reactant | Saddle | Product |
|----------|--------|---------|
| 0        | -1403  | 0       |
| 0        | -162.2 | 0       |
| 0        | 0      | 0       |
| 0        | 0      | 0       |
| 0        | 0      | 0       |
| 0        | 0      | 0       |
| 31.3     | 0      | 60.9    |
| 53.5     | 0      | 98.1    |
| 85.3     | 11.1   | 132.6   |
| 91       | 63     | 181.8   |
| 138.2    | 107.2  | 191.2   |
| 174.1    | 189.1  | 217.8   |
| 226.3    | 208.6  | 230.6   |
| 243.8    | 221.4  | 263.4   |
| 260.2    | 286    | 278.4   |
| 267.8    | 301.3  | 348.3   |
| 315.3    | 356.3  | 375.8   |
| 334.9    | 383.9  | 412.7   |
| 342.7    | 430.9  | 444.9   |
| 387      | 447.7  | 494.7   |
| 409.5    | 458.8  | 514.6   |
| 458.7    | 502.4  | 562     |
| 459.3    | 518    | 591.7   |
| 476.1    | 549.3  | 673.4   |
| 529.8    | 622.2  | 723.9   |
| 633.2    | 659.9  | 760     |
| 673.3    | 669    | 769.1   |
| 739.5    | 746    | 877.9   |
| 750      | 748.5  | 923     |
| 772.7    | 773.1  | 974.8   |
| 858.1    | 854.7  | 999.8   |
| 972.2    | 909.4  | 1039.2  |
| 991.5    | 986.2  | 1096.4  |
| 1062.7   | 1004.9 | 1104    |
| 1067.8   | 1037.9 | 1117.2  |
| 1126.8   | 1100.7 | 1128.1  |
| 1136.7   | 1126.3 | 1162.9  |

|        |        |        |
|--------|--------|--------|
| 1169   | 1146   | 1202.6 |
| 1224.6 | 1214.8 | 1231.4 |
| 1267   | 1221.1 | 1272.6 |
| 1334.4 | 1269.9 | 1301.4 |
| 1371   | 1326.6 | 1316.5 |
| 1384.9 | 1346.7 | 1352.1 |
| 1432.8 | 1380.3 | 1358.9 |
| 1454.6 | 1387.4 | 1386.3 |
| 1465.1 | 1403.2 | 1404.9 |
| 1481.6 | 1452.8 | 1436.9 |
| 1510.8 | 1460.2 | 1462.8 |
| 1517.9 | 1466.6 | 1474.4 |
| 1564.4 | 1479.1 | 1494.5 |
| 1630.7 | 1490.9 | 1505.1 |
| 1688   | 1604.3 | 1686.8 |
| 1715.4 | 1708.1 | 1723.3 |
| 2996   | 1786.7 | 2998.1 |
| 3036.8 | 2996.7 | 3012.5 |
| 3053.7 | 3041.7 | 3028.2 |
| 3100.8 | 3070.1 | 3041.2 |
| 3118.2 | 3076   | 3086.8 |
| 3138.6 | 3124.9 | 3104.8 |
| 3206.3 | 3132.3 | 3136.4 |
| 3701.7 | 3179.7 | 3143.6 |
| 3709   | 3674.1 | 3709.6 |
| 3822   | 3692.4 | 3715   |

Table S11. 1-methylcytosine (t) coordinates

Table S11A Reactant state

|    |   |        |        |        |
|----|---|--------|--------|--------|
| 1  | H | 2.15   | -1.638 | 1.283  |
| 2  | H | -2.566 | -0.935 | 0.441  |
| 3  | H | 1.859  | 0.04   | 1.873  |
| 4  | C | 1.978  | -0.592 | 0.985  |
| 5  | H | 2.825  | -0.245 | 0.386  |
| 6  | N | 0.779  | -0.496 | 0.15   |
| 7  | C | -0.462 | -0.764 | 0.687  |
| 8  | O | 0.396  | 2.27   | 2.215  |
| 9  | C | 0.918  | -0.122 | -1.197 |
| 10 | O | 2.002  | 0.156  | -1.71  |
| 11 | N | -0.272 | -0.086 | -1.898 |
| 12 | C | -1.574 | -0.358 | -1.437 |

|    |   |        |        |        |
|----|---|--------|--------|--------|
| 13 | N | -2.535 | -0.254 | -2.295 |
| 14 | C | -1.612 | -0.712 | -0.031 |
| 15 | H | 0.736  | 2.554  | 1.349  |
| 16 | H | -0.454 | -1.012 | 1.748  |
| 17 | H | -0.55  | 2.49   | 2.17   |
| 18 | H | -3.428 | -0.475 | -1.841 |
| 19 | H | -0.19  | 0.18   | -2.877 |

Table S11B. Transition state coordinates

|    |   |        |        |        |
|----|---|--------|--------|--------|
| 1  | H | 2.135  | -1.326 | 1.68   |
| 2  | H | -2.343 | -0.807 | 0.55   |
| 3  | H | 2.313  | 0.456  | 1.629  |
| 4  | C | 2.185  | -0.451 | 1.02   |
| 5  | H | 3.022  | -0.55  | 0.325  |
| 6  | N | 0.948  | -0.362 | 0.241  |
| 7  | C | -0.246 | -0.412 | 0.882  |
| 8  | O | -0.642 | 1.325  | 1.82   |
| 9  | C | 1.058  | 0.026  | -1.131 |
| 10 | O | 2.147  | 0.188  | -1.664 |
| 11 | N | -0.14  | 0.181  | -1.78  |
| 12 | C | -1.438 | -0.083 | -1.291 |
| 13 | N | -2.38  | -0.102 | -2.168 |
| 14 | C | -1.499 | -0.227 | 0.167  |
| 15 | H | -0.05  | 2.056  | 1.551  |
| 16 | H | -0.233 | -0.905 | 1.851  |
| 17 | H | -1.476 | 0.912  | 0.82   |
| 18 | H | -3.285 | -0.276 | -1.719 |
| 19 | H | -0.074 | 0.357  | -2.783 |

Table S11C. Photohydrate product coordinates

|    |   |        |        |        |
|----|---|--------|--------|--------|
| 1  | H | 1.987  | -0.936 | 1.987  |
| 2  | H | -1.476 | -1.602 | 0.058  |
| 3  | H | 2.425  | 0.726  | 1.468  |
| 4  | C | 2.141  | -0.281 | 1.119  |
| 5  | H | 2.965  | -0.662 | 0.509  |
| 6  | N | 0.926  | -0.269 | 0.309  |
| 7  | C | -0.34  | -0.033 | 0.98   |
| 8  | O | -0.591 | 1.351  | 1.277  |
| 9  | C | 1.078  | 0.043  | -1.038 |
| 10 | O | 2.173  | 0.172  | -1.589 |
| 11 | N | -0.106 | 0.174  | -1.761 |

|    |   |        |        |        |
|----|---|--------|--------|--------|
| 12 | C | -1.409 | 0.033  | -1.303 |
| 13 | N | -2.373 | 0.307  | -2.105 |
| 14 | C | -1.496 | -0.502 | 0.107  |
| 15 | H | 0.118  | 1.668  | 1.863  |
| 16 | H | -0.318 | -0.617 | 1.917  |
| 17 | H | -2.443 | -0.194 | 0.567  |
| 18 | H | -3.273 | 0.155  | -1.637 |
| 19 | H | 0.013  | 0.469  | -2.728 |

Table S12. 1-methylcytosine(t) vibrational wave numbers (cm<sup>-1</sup>)

| Reactant | Saddle  | Product |
|----------|---------|---------|
| 0        | -1518.9 | 0       |
| 0        | 0       | 0       |
| 0        | 0       | 0       |
| 0        | 0       | 0       |
| 0        | 0       | 0       |
| 0        | 0       | 0       |
| 26.3     | 0       | 88.8    |
| 46.4     | 75.5    | 121.7   |
| 78.9     | 105.7   | 141.6   |
| 119.1    | 143.5   | 182.4   |
| 169.6    | 162.8   | 319.8   |
| 182.9    | 260.1   | 336.6   |
| 234.5    | 312.8   | 365.2   |
| 241.1    | 342.2   | 378.2   |
| 340.1    | 368.8   | 408     |
| 345.9    | 392.8   | 424.3   |
| 370.3    | 447.1   | 489.9   |
| 377.3    | 457.1   | 542.7   |
| 422.6    | 507.7   | 560.4   |
| 457.4    | 533     | 604.1   |
| 539.8    | 562.2   | 639.3   |
| 605.4    | 605.2   | 719.4   |
| 629.7    | 645.6   | 752.2   |
| 705.1    | 703.8   | 775.7   |
| 733.4    | 715     | 846.1   |
| 739.8    | 747.8   | 876.8   |
| 756.3    | 776     | 929     |
| 782.2    | 796.6   | 953.6   |
| 802.1    | 856.1   | 1029.4  |
| 920.8    | 930.4   | 1057.8  |
| 963      | 982.9   | 1105.4  |

|        |        |        |
|--------|--------|--------|
| 1043.8 | 1023.9 | 1147.7 |
| 1118.9 | 1102.4 | 1164.7 |
| 1164.5 | 1133   | 1181.9 |
| 1192.5 | 1155.4 | 1207   |
| 1202.7 | 1175.8 | 1257.5 |
| 1278.1 | 1252.4 | 1287.9 |
| 1331.1 | 1315.6 | 1310.2 |
| 1364.9 | 1360.7 | 1350.4 |
| 1412.9 | 1374.9 | 1389.4 |
| 1448.8 | 1390.6 | 1409   |
| 1471.4 | 1414   | 1415.7 |
| 1504.3 | 1422   | 1432.9 |
| 1527.9 | 1472.4 | 1447.9 |
| 1619.6 | 1495.2 | 1484   |
| 1643   | 1510.1 | 1524.1 |
| 1704   | 1666.7 | 1706.2 |
| 1758.4 | 1677.3 | 1709.1 |
| 3036   | 1756   | 3006.8 |
| 3122.7 | 3041   | 3013.3 |
| 3183.9 | 3121.4 | 3031.9 |
| 3184.8 | 3145.7 | 3101.1 |
| 3242.9 | 3158.5 | 3118.7 |
| 3448.3 | 3187.9 | 3159.7 |
| 3549.4 | 3439.9 | 3448.8 |
| 3698.7 | 3526.4 | 3536.8 |
| 3818.4 | 3672.3 | 3724.3 |

#### 4.0 Validation using hybrid density functional and CCSD methods

The result obtained using the PBE functional using the numerical basis set was compared to the two independent methods in order to validate the results. The first method selected was a hybrid density functional theory method. We used the M062X functional developed by Truhlar's group. The second method is the post-Hartree Fock method of the coupled cluster for singles and doubles. The results of this comparison for the 1-methylpyrimidines is present in Table S13. The total energy calculated using each method is presented for reactant transition state and product. Table S14 shows a further step in the analysis of these calculations, in which the energy was converted to eV and the reactant energy for each molecule was arbitrarily set equal to 0.



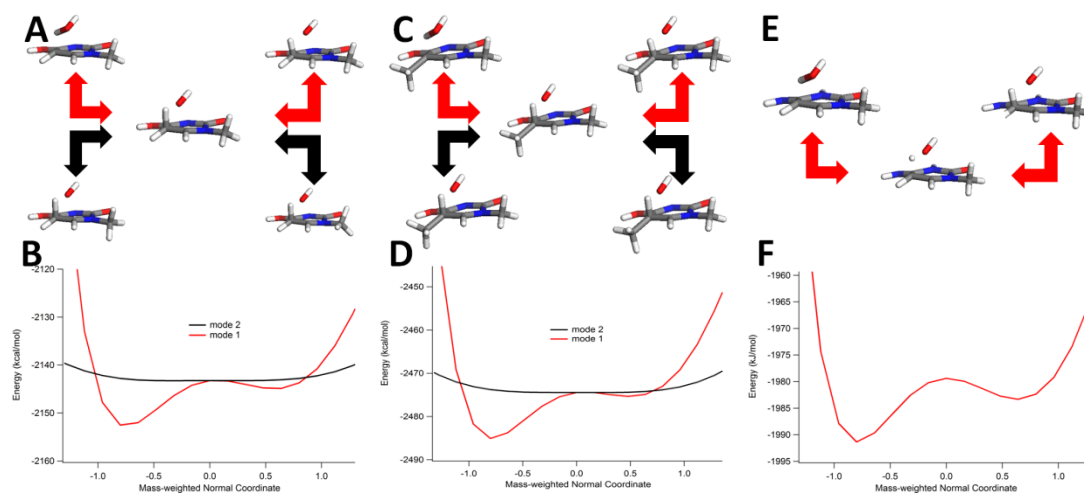

Figure S8. Depiction of the eigenvectors of the normal coordinates with negative eigenvectors for the tautomers of the 1-methylpyrimidines. A. 1-MU has two negative eigenvectors indicated by the red and black arrows. The red arrows show a HO-H bond breaking similar to 1-MU. The black coordinate is a methyl rotation. B. The double well potential corresponding to the projection along the eigenvector. C. 1-MT also has two negative eigenvectors indicated by the red and black arrows with same significance as in A, D. The corresponding potential energy surfaces for 1-MT. E. 1-MU has a single negative eigenvector. F. The potential energy surfaces for the corresponding eigenvector is a could well potential surface..

#### 4.1 Total energies of the normal pyridimidine structures

Table S13. Energies of reactant, product, and transition states for photohydration reactions of cytosine, thymine and uracil in Hartrees calculated using the PBE functional and numerical basis set compared with the CCSD post-Hartree-Fock and the M062x hybrid functional methods.

| <b>Uracil</b>   | <b>PBE</b>  | <b>M062x</b> | <b>CCSD</b> | <b>CCSD(T)</b> |
|-----------------|-------------|--------------|-------------|----------------|
| Reactant        | -530.190964 | -530.5168923 | -529.356629 | -529.426799    |
| Transition      | -530.118434 | -539.419430  | -529.261053 | -529.337867    |
| Product         | -530.191173 | -530.514250  | -529.365723 | -529.434987    |
| <b>Thymine</b>  | <b>PBE</b>  | <b>M062x</b> | <b>CCSD</b> | <b>CCSD(T)</b> |
| Reactant        | -569.466777 | -569.819171  | -568.569669 | -568.646189    |
| Transition      | -569.391151 | -569.724268  | -568.470884 | -568.554487    |
| Product         | -569.464214 | -569.8228759 | -568.574610 | -568.650935    |
| <b>Cytosine</b> | <b>PBE</b>  | <b>M062x</b> | <b>CCSD</b> | <b>CCSD(T)</b> |
| Reactant        | -510.303271 | -510.615184  | -509.486056 | -509.558471    |
| Transition      | -510.232672 | -510.530432  | -509.395245 | -509.472828    |
| Product         | -510.296671 | -510.616772  | -509.489329 | -509.559890    |

Table S14. Energies of reactant, product, and transition states for photohydration reactions of cytosine, thymine and uracil in eV calculated using the PBE functional and numerical basis set compared with post-Hartree-Fock CCSD and the M062x hybrid functional using DFT.

| <b>Uracil</b>   | <b>PBE</b> | <b>M062x</b> | <b>CCSD</b> | <b>CCSD(T)</b> |
|-----------------|------------|--------------|-------------|----------------|
| Reactant        | 0          | 0            | 0           | 0              |
| Transition      | 1.9728152  | 2.650974     | 2.5996684   | 2.41895        |
| Product         | -0.0056856 | -0.07187     | -0.2473556  | -0.222713      |
| <b>Thymine</b>  | <b>PBE</b> | <b>M062x</b> | <b>CCSD</b> | <b>CCSD(T)</b> |
| Reactant        | 0          | 0            | 0           | 0              |
| Transition      | 2.0570228  | 2.58136      | 2.58136     | 2.494240       |
| Product         | 0.0697092  | -0.10077     | -0.134392   | -0.129146      |
| <b>Cytosine</b> | <b>PBE</b> | <b>M062x</b> | <b>CCSD</b> | <b>CCSD(T)</b> |
| Reactant        | 0          | 0            | 0           | 0              |
| Transition      | 1.9202916  | 2.30525      | 2.4700288   | 2.329489       |
| Product         | 0.1795188  | -0.0432      | -0.0890288  | -0.03859       |

#### 4.2 Total energies of tautomers of pyridine structures

Table S15. Total energies of reactant, product, and transition states for photohydration reactions of tautomers of cytosine, thymine and uracil in Hartrees calculated using the PBE functional and numerical basis set compare to CCSD post-Hartree-Fock and the M062x hybrid functional methods.

| <b>Uracil</b>   | <b>PBE</b>  | <b>M062x</b> | <b>CCSD</b> |
|-----------------|-------------|--------------|-------------|
| Reactant        | -530.160693 | -530.476965  | -529.324498 |
| Transition      | -530.106410 | -530.391106  | -529.232584 |
| Product         | -530.152615 | -530.475661  | -529.319870 |
| <b>Thymine</b>  | <b>PBE</b>  | <b>M062x</b> | <b>CCSD</b> |
| Reactant        | -569.437829 | -569.783150  | -568.534209 |
| Transition      | -569.363275 | -569.694717  | -568.441182 |
| Product         | -569.425249 | -569.781579  | -568.530973 |
| <b>Cytosine</b> | <b>PBE</b>  | <b>M062x</b> | <b>CCSD</b> |
| Reactant        | -510.298670 | -510.612846  | -509.485967 |
| Transition      | -510.227904 | -510.527734  | -509.394191 |
| Product         | -510.300518 | -510.623673  | -509.497562 |

Table S16. Difference energies of reactant, product, and transition states for photohydration reactions of tautomers of cytosine, thymine and uracil in eV calculated using the PBE functional and numerical basis set compare to CCSD post-Hartree-Fock and the M062x hybrid functional methods.

| <b>Uracil</b>   | <b>PBE</b> | <b>M062x</b> | <b>CCSD</b> |
|-----------------|------------|--------------|-------------|
| Reactant        | 0          | 0            | 0           |
| Transition      | 1.924835   | 2.3353168    | 2.5000152   |
| Product         | 0.05026    | 0.0354208    | 0.125836    |
| <b>Thymine</b>  | <b>PBE</b> | <b>M062x</b> | <b>CCSD</b> |
| Reactant        | 0          | 0            | 0           |
| Transition      | 2.02782    | 2.4053976    | 2.5303496   |
| Product         | 0.3421272  | 0.0427512    | 0.0880344   |
| <b>Cytosine</b> | <b>PBE</b> | <b>M062x</b> | <b>CCSD</b> |
| Reactant        | 0          | 0            | 0           |
| Transition      | 1.8965112  | 2.3150352    | 2.4963048   |
| Product         | -0.07859   | -0.294506    | -0.315386   |

### 4.3 Application of the equation of motion CCSD method

The equation of motion (EOM) CCSD calculation was implemented in order to test whether the transition state was coincident with an intersection between the ground and excited state. This is an extremely expensive calculation and therefore it was only carried out for the transition state geometry. A benchmark for the single point calculation of the uracil hydrate required 11 seconds of CPU time, while the EOMCCSD calculation on the same system required  $1.24 \times 10^6$  seconds. The results indicated that the transition state is not a conical intersection. There were no curve crossings at the transition state detected by the EOM-CCSD method. Similar results were obtained using TD-DFT methods, but these computations were not included since they add nothing new.

Table S17. Equation of motion CCSD energies (in Hartrees)

| <b>Uracil</b>   | <b>EOMCCSD</b> |
|-----------------|----------------|
| Transition      | -529.195391    |
| <b>Thymine</b>  | <b>EOMCCSD</b> |
| Transition      | NA             |
| <b>Cytosine</b> | <b>EOMCCSD</b> |
| Transition      | -509.395246    |

### 4.3.1 EOM CCSD output for 1-methyluracil and H<sub>2</sub>O

Excitation energies and oscillator strengths:

-----  
Excited State 1: Singlet-A 4.3235 eV 286.76 nm f=?

Right Eigenvector

Alpha Singles Amplitudes

| I  | SymI | A  | SymA | Value     |
|----|------|----|------|-----------|
| 38 | 1    | 39 | 1    | 0.225984  |
| 38 | 1    | 40 | 1    | -0.105999 |
| 38 | 1    | 41 | 1    | -0.116993 |
| 38 | 1    | 42 | 1    | 0.111862  |
| 38 | 1    | 43 | 1    | -0.445559 |
| 38 | 1    | 45 | 1    | 0.227136  |
| 38 | 1    | 51 | 1    | -0.108405 |

Beta Singles Amplitudes

| I  | SymI | A  | SymA | Value     |
|----|------|----|------|-----------|
| 38 | 1    | 39 | 1    | 0.225984  |
| 38 | 1    | 40 | 1    | -0.105999 |
| 38 | 1    | 41 | 1    | -0.116993 |
| 38 | 1    | 42 | 1    | 0.111862  |
| 38 | 1    | 43 | 1    | -0.445559 |
| 38 | 1    | 45 | 1    | 0.227136  |
| 38 | 1    | 51 | 1    | -0.108405 |

Total Energy, E(EOM-CCSD) = -529.102165657

-----  
Excited State 2: Singlet-A 5.4788 eV 226.30 nm f=?

Right Eigenvector

Alpha Singles Amplitudes

| I  | SymI | A  | SymA | Value     |
|----|------|----|------|-----------|
| 35 | 1    | 43 | 1    | 0.115705  |
| 35 | 1    | 46 | 1    | 0.106704  |
| 35 | 1    | 48 | 1    | 0.212448  |
| 35 | 1    | 50 | 1    | -0.115204 |
| 35 | 1    | 51 | 1    | -0.288956 |
| 36 | 1    | 51 | 1    | -0.129293 |
| 37 | 1    | 39 | 1    | 0.110276  |
| 37 | 1    | 43 | 1    | -0.225246 |
| 38 | 1    | 40 | 1    | 0.105023  |
| 38 | 1    | 46 | 1    | -0.104083 |
| 38 | 1    | 48 | 1    | -0.110057 |
| 38 | 1    | 51 | 1    | 0.160082  |

Beta Singles Amplitudes

| I  | SymI | A  | SymA | Value     |
|----|------|----|------|-----------|
| 35 | 1    | 43 | 1    | 0.115705  |
| 35 | 1    | 46 | 1    | 0.106704  |
| 35 | 1    | 48 | 1    | 0.212448  |
| 35 | 1    | 50 | 1    | -0.115204 |
| 35 | 1    | 51 | 1    | -0.288956 |
| 36 | 1    | 51 | 1    | -0.129293 |
| 37 | 1    | 39 | 1    | 0.110276  |
| 37 | 1    | 43 | 1    | -0.225246 |
| 38 | 1    | 40 | 1    | 0.105023  |
| 38 | 1    | 46 | 1    | -0.104083 |
| 38 | 1    | 48 | 1    | -0.110057 |
| 38 | 1    | 51 | 1    | 0.160082  |

-----  
Excited State 3: Singlet-A 5.7074 eV 217.23 nm f=?

Right Eigenvector

Alpha Singles Amplitudes

| I  | SymI | A  | SymA | Value     |
|----|------|----|------|-----------|
| 35 | 1    | 43 | 1    | 0.121069  |
| 35 | 1    | 48 | 1    | 0.176327  |
| 35 | 1    | 51 | 1    | -0.229303 |
| 37 | 1    | 39 | 1    | -0.189065 |
| 37 | 1    | 43 | 1    | 0.345569  |
| 37 | 1    | 45 | 1    | -0.161769 |

Beta Singles Amplitudes

| I  | SymI | A  | SymA | Value     |
|----|------|----|------|-----------|
| 35 | 1    | 43 | 1    | 0.121069  |
| 35 | 1    | 48 | 1    | 0.176327  |
| 35 | 1    | 51 | 1    | -0.229303 |
| 37 | 1    | 39 | 1    | -0.189065 |
| 37 | 1    | 43 | 1    | 0.345569  |
| 37 | 1    | 45 | 1    | -0.161769 |

-----  
Excited State 4: Singlet-A 6.0757 eV 204.06 nm f=?

Right Eigenvector

Alpha Singles Amplitudes

| I  | SymI | A  | SymA | Value     |
|----|------|----|------|-----------|
| 34 | 1    | 43 | 1    | 0.114682  |
| 37 | 1    | 42 | 1    | 0.104399  |
| 37 | 1    | 43 | 1    | -0.152964 |
| 38 | 1    | 39 | 1    | -0.345210 |
| 38 | 1    | 40 | 1    | -0.236109 |
| 38 | 1    | 42 | 1    | 0.272216  |

|                         |      |    |      |           |
|-------------------------|------|----|------|-----------|
| 38                      | 1    | 45 | 1    | 0.138648  |
| 38                      | 1    | 46 | 1    | 0.132581  |
| Beta Singles Amplitudes |      |    |      |           |
| I                       | SymI | A  | SymA | Value     |
| 34                      | 1    | 43 | 1    | 0.114682  |
| 37                      | 1    | 42 | 1    | 0.104399  |
| 37                      | 1    | 43 | 1    | -0.152964 |
| 38                      | 1    | 39 | 1    | -0.345210 |
| 38                      | 1    | 40 | 1    | -0.236109 |
| 38                      | 1    | 42 | 1    | 0.272216  |
| 38                      | 1    | 45 | 1    | 0.138648  |
| 38                      | 1    | 46 | 1    | 0.132581  |

### 4.3.2 EOM CCSD output for 1-methylcytosine and H<sub>2</sub>O

Excitation energies and oscillator strengths:

-----  
 Excited State 1: Singlet-A 4.3946 eV 282.13 nm f=?

Right Eigenvector

Alpha Singles Amplitudes

| I  | SymI | A  | SymA | Value     |
|----|------|----|------|-----------|
| 36 | 1    | 43 | 1    | -0.121975 |
| 36 | 1    | 45 | 1    | 0.107351  |
| 36 | 1    | 46 | 1    | 0.100929  |
| 38 | 1    | 39 | 1    | 0.145434  |
| 38 | 1    | 40 | 1    | 0.126320  |
| 38 | 1    | 42 | 1    | -0.188517 |
| 38 | 1    | 43 | 1    | 0.281924  |
| 38 | 1    | 44 | 1    | 0.167888  |
| 38 | 1    | 45 | 1    | -0.217603 |
| 38 | 1    | 46 | 1    | -0.168427 |
| 38 | 1    | 47 | 1    | -0.126280 |
| 38 | 1    | 49 | 1    | -0.101809 |
| 38 | 1    | 53 | 1    | 0.160972  |

Beta Singles Amplitudes

| I  | SymI | A  | SymA | Value     |
|----|------|----|------|-----------|
| 36 | 1    | 43 | 1    | -0.121975 |
| 36 | 1    | 45 | 1    | 0.107351  |
| 36 | 1    | 46 | 1    | 0.100929  |
| 38 | 1    | 39 | 1    | 0.145434  |
| 38 | 1    | 40 | 1    | 0.126320  |
| 38 | 1    | 42 | 1    | -0.188517 |
| 38 | 1    | 43 | 1    | 0.281924  |
| 38 | 1    | 44 | 1    | 0.167888  |

|    |   |    |   |           |
|----|---|----|---|-----------|
| 38 | 1 | 45 | 1 | -0.217603 |
| 38 | 1 | 46 | 1 | -0.168427 |
| 38 | 1 | 47 | 1 | -0.126280 |
| 38 | 1 | 49 | 1 | -0.101809 |
| 38 | 1 | 53 | 1 | 0.160972  |

Total Energy, E(EOM-CCSD) = -509.233747612

-----  
Excited State 2: Singlet-A 5.1375 eV 241.33 nm f=?

Right Eigenvector

Alpha Singles Amplitudes

| I  | SymI | A  | SymA | Value     |
|----|------|----|------|-----------|
| 36 | 1    | 43 | 1    | -0.134771 |
| 37 | 1    | 42 | 1    | 0.122516  |
| 37 | 1    | 43 | 1    | -0.202173 |
| 37 | 1    | 44 | 1    | -0.120142 |
| 37 | 1    | 45 | 1    | 0.167766  |
| 38 | 1    | 41 | 1    | -0.107864 |
| 38 | 1    | 43 | 1    | 0.205936  |
| 38 | 1    | 46 | 1    | 0.229490  |
| 38 | 1    | 48 | 1    | -0.119420 |
| 38 | 1    | 49 | 1    | 0.152344  |
| 38 | 1    | 50 | 1    | 0.117187  |

Beta Singles Amplitudes

| I  | SymI | A  | SymA | Value     |
|----|------|----|------|-----------|
| 36 | 1    | 43 | 1    | -0.134771 |
| 37 | 1    | 42 | 1    | 0.122516  |
| 37 | 1    | 43 | 1    | -0.202173 |
| 37 | 1    | 44 | 1    | -0.120142 |
| 37 | 1    | 45 | 1    | 0.167766  |
| 38 | 1    | 41 | 1    | -0.107864 |
| 38 | 1    | 43 | 1    | 0.205936  |
| 38 | 1    | 46 | 1    | 0.229490  |
| 38 | 1    | 48 | 1    | -0.119420 |
| 38 | 1    | 49 | 1    | 0.152344  |
| 38 | 1    | 50 | 1    | 0.117187  |

-----  
Excited State 3: Singlet-A 5.3779 eV 230.54 nm f=?

Right Eigenvector

Alpha Singles Amplitudes

| I  | SymI | A  | SymA | Value     |
|----|------|----|------|-----------|
| 34 | 1    | 43 | 1    | 0.199500  |
| 34 | 1    | 44 | 1    | 0.116577  |
| 34 | 1    | 45 | 1    | -0.140671 |

|    |   |    |   |           |
|----|---|----|---|-----------|
| 34 | 1 | 48 | 1 | -0.115502 |
| 35 | 1 | 41 | 1 | -0.110930 |
| 35 | 1 | 43 | 1 | 0.316274  |
| 35 | 1 | 44 | 1 | 0.163382  |
| 35 | 1 | 45 | 1 | -0.198939 |
| 35 | 1 | 48 | 1 | -0.188248 |
| 38 | 1 | 43 | 1 | -0.111467 |
| 38 | 1 | 46 | 1 | -0.103334 |

Beta Singles Amplitudes

| I  | SymI | A  | SymA | Value     |
|----|------|----|------|-----------|
| 34 | 1    | 43 | 1    | 0.199500  |
| 34 | 1    | 44 | 1    | 0.116577  |
| 34 | 1    | 45 | 1    | -0.140671 |
| 34 | 1    | 48 | 1    | -0.115502 |
| 35 | 1    | 41 | 1    | -0.110930 |
| 35 | 1    | 43 | 1    | 0.316274  |
| 35 | 1    | 44 | 1    | 0.163382  |
| 35 | 1    | 45 | 1    | -0.198939 |
| 35 | 1    | 48 | 1    | -0.188248 |
| 38 | 1    | 43 | 1    | -0.111467 |
| 38 | 1    | 46 | 1    | -0.103334 |

-----  
Excited State 4: Singlet-A 5.6317 eV 220.15 nm f=?

Right Eigenvector

Alpha Singles Amplitudes

| I  | SymI | A  | SymA | Value     |
|----|------|----|------|-----------|
| 34 | 1    | 41 | 1    | -0.110310 |
| 34 | 1    | 43 | 1    | 0.317698  |
| 34 | 1    | 44 | 1    | 0.165733  |
| 34 | 1    | 45 | 1    | -0.196085 |
| 34 | 1    | 48 | 1    | -0.192578 |
| 35 | 1    | 43 | 1    | -0.205688 |
| 35 | 1    | 45 | 1    | 0.103308  |
| 35 | 1    | 46 | 1    | -0.128848 |
| 35 | 1    | 48 | 1    | 0.133513  |
| 37 | 1    | 43 | 1    | 0.135360  |

Beta Singles Amplitudes

| I  | SymI | A  | SymA | Value     |
|----|------|----|------|-----------|
| 34 | 1    | 41 | 1    | -0.110310 |
| 34 | 1    | 43 | 1    | 0.317698  |
| 34 | 1    | 44 | 1    | 0.165733  |
| 34 | 1    | 45 | 1    | -0.196085 |
| 34 | 1    | 48 | 1    | -0.192578 |
| 35 | 1    | 43 | 1    | -0.205688 |



|    |   |    |   |           |
|----|---|----|---|-----------|
| 35 | 1 | 45 | 1 | 0.103308  |
| 35 | 1 | 46 | 1 | -0.128848 |
| 35 | 1 | 48 | 1 | 0.133513  |
| 37 | 1 | 43 | 1 | 0.135360  |

## 5.0 Crossover NEB calculation between two different tautomers

A NEB calculation was implemented with an initial structure consisting of the normal tautomer of each of the three pyrimidines and a final structure consisting of the tautomeric form. It appears that the algorithm misses the transition state for uracil and thymidine. The energies are reported below for sake of completeness. However, all comparisons of the two tautomeric forms of each pyrimidine in the manuscript are based on two parallel NEB trajectories, one for each tautomer. The crossover was not discussed since the significance of the calculation is not clear.

Table S18. Energies of reactant, product, and transition states for photohydration reactions for the reaction from the normal form to the tautomer of cytosine, thymine and uracil in Hartrees calculated using the PBE functional and numerical basis set compare to CCSD post-Hartree-Fock and the M062x hybrid functional methods.

| <b>Uracil</b>   | <b>PBE</b>  | <b>M062x</b> | <b>CCSD</b> |
|-----------------|-------------|--------------|-------------|
| Reactant        | -530.190964 | -530.516892  | -529.356629 |
| Transition      | -530.166690 | -530.401242  | -529.242232 |
| Product         | -530.156534 | -530.475661  | -529.319870 |
| <b>Thymine</b>  | <b>PBE</b>  | <b>M062x</b> | <b>CCSD</b> |
| Reactant        | -569.466777 | -569.812267  | -568.569669 |
| Transition      | -569.425227 | -569.782006  | -568.       |
| Product         | -569.425249 | -569.781579  | -568.530973 |
| <b>Cytosine</b> | <b>PBE</b>  | <b>M062x</b> | <b>CCSD</b> |
| Reactant        | -510.301404 | -510.615184  | -509.486056 |
| Transition      | -510.227994 | -510.527513  | -509.393706 |
| Product         | -510.300518 | -510.623673  | -509.497562 |

## 6.0 Excited state geometry optimization at the transition state geometry

We conducted calculations of the excited state energy and geometry starting at the transition state geometry in order to ascertain whether there is a conical intersection that lies near the transition state, but is not precisely at the transition state geometry.

The optimization was constrained in the first excited state using the Occupation Fixed option in DMol<sup>3</sup>. In this case the charge is disabled and the calculation type is set to "optimize". The result of geometry optimization was significant departure from the transition state geometry for all three pyrimidines. The water molecule is no longer in a bond forming geometry. Moreover, the ring distorts to a folded geometry that is similar to the geometry reported for the conical intersection from the excited state of uridine. The energy of the geometry optimized state is more than 25 kcal/mol higher than the transition state.

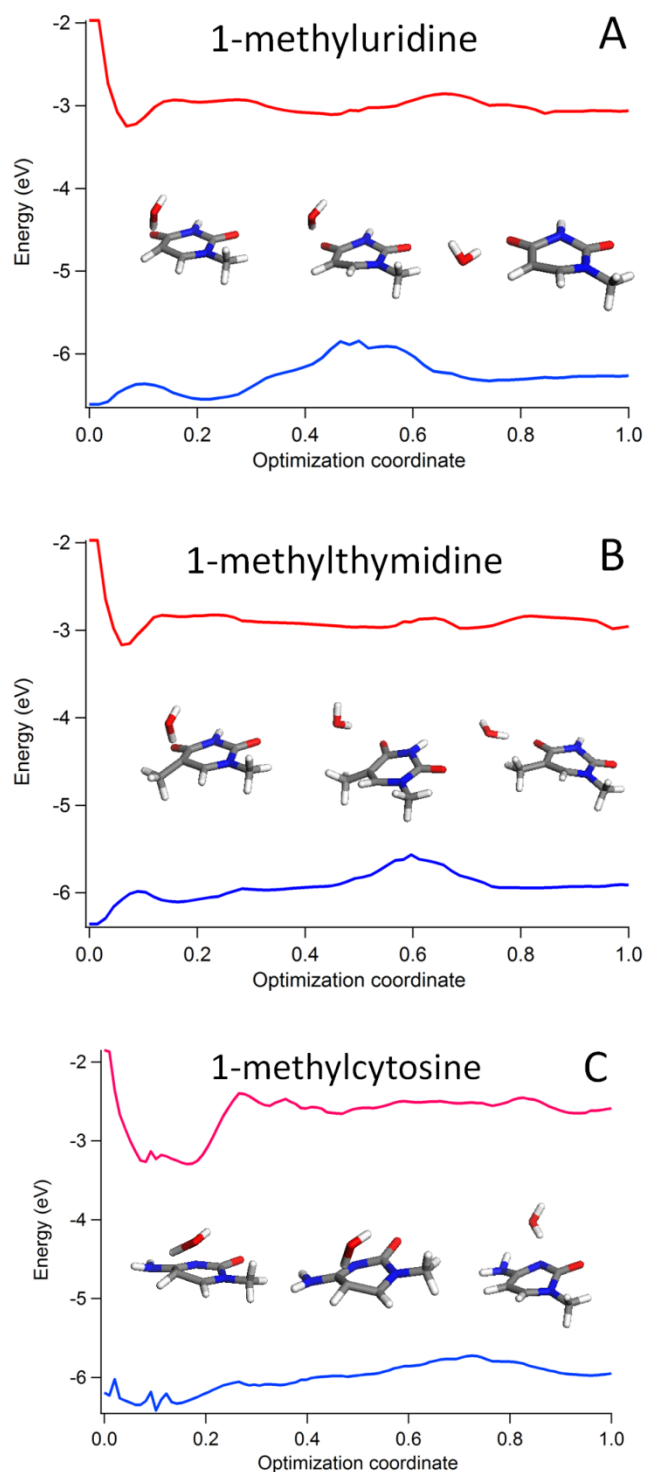

Figure S9. Energies of the HOMO and LUMO for the three pyrimidine hydrate models studied plotted from the transition state (0.0) to the optimized geometry coordinate (1.0) when constrained to find the lowest energy in the fixed occupation of the lowest excited state. The models are A. 1-MU, B. 1-MT and C. 1-MC.

In the case of uridine, this energy is approximately where the calculated CI is observed in the calculation of Ref. 14 (Matsika, *J. Phys. Chem. A*, 2004, 108, 7584–7590). Thus, these calculations show that there is no CI at the transition state geometry and the CI is located at a geometry, in which the H<sub>2</sub>O molecule is dissociated from the pyridimine and in a folded geometry shown in Figure 5 of the text and the energies and selected structures along the trajectories for the optimization are plotted in Figure S9.

Table S19. Energies of transition states and the geometry optimized excited states starting at the transition geometry.

| <b>Uracil</b>                      | <b>PBE Hartrees (kcal/mol)</b> |
|------------------------------------|--------------------------------|
| Optimized Excited Transition State | -530.063115                    |
| Transition State                   | -530.118434                    |
| Energy Gap                         | 0.05531 (34.71)                |
| <b>Thymine</b>                     |                                |
| Optimized Excited Transition State | -569.3478092                   |
| Transition State                   | -569.3911510                   |
| Energy Gap                         | 0.04334 (27.20)                |
| <b>Cytosine</b>                    |                                |
| Optimized Excited Transition State | -510.1816832                   |
| Transition State                   | -510.2326720                   |
| Energy Gap                         | 0.0509 (31.99)                 |

## 7.0 Ethene hydration calculated using the NEB method

The ethene hydration NEB calculation serves as a model system. Ground state NEB trajectory for ethene hydration is shown in Figure S10. The coordinates for each of the models, reactant, transition state and product are given Table S20. The total energies from the calculation using various methods are given Table S21. The barrier for hydrate formation is approximately  $\sim 2.0$  eV or  $\sim 46.0$  kcal/mol. This value is only slightly larger than the value for uracil or thymidine. The energies of the HOMO-1, HOMO and LUMO are shown in Figure S11. As seen in Tables 1 and S22, the formation of hydrates in the pyrimidines is slightly endothermic based on the PBE functional in DMol<sup>3</sup>. The relative simplicity of ethene suggests it may be a good model for the transition state. In addition to reporting the coordinates for reactant, transition state and product (Tables S20A, S20B and S20C), the wave numbers for each state are reported in Table S21 in cm<sup>-1</sup>.

The NEB for the model system of ethene + H<sub>2</sub>O calculated using the hybrid-metal M06-2x functional and a 6-311+G(d,p) basis set implemented in Gaussian09 had computational cost 9.3 times greater than the DMol<sup>3</sup> approach. The coupled cluster of singles and doubles (CCSD) method also implemented in Gaussian09 had a computational cost 1,800 times greater than the DMol<sup>3</sup> approach. We found that the EOMCCSD method required CPU time  $>26,000$  times greater than the DMol<sup>3</sup> approach. Because of the scaling of these methods, the different factors are larger by a factor of 3-4 for the pyrimidines. For example, the EOMCCSD requires  $>10^5$  times greater CPU for ethene and 1-MU where direct comparisons were made.

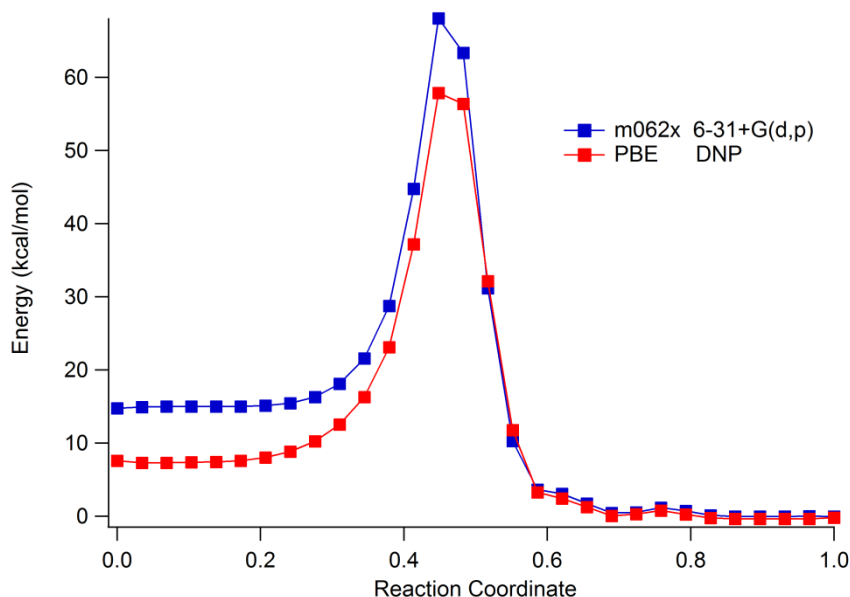

Figure S10. Energy of the NEB trajectory for each of 30 states calculated from reactant to product. The energy reported is based on the binding energy for each geometry calculated by two DFT methods. The first method is the numerical basis set (DNP) and the PBE functional calculated using DMol<sup>3</sup>. The second method is hybrid functional M062x and calculation using Gaussian09.

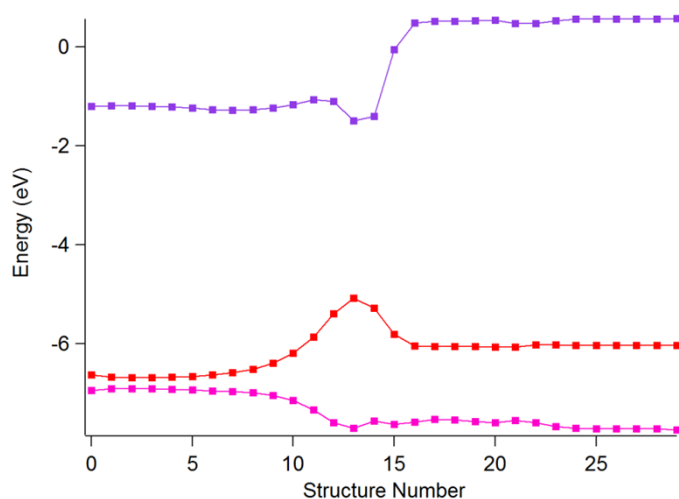

Figure S11. Energy of the HOMO-1, HOMO and LUMO for ethane for each of the 30 geometries used in the NEB calculation calculated using the numerical basis set (DNP) and the PBE functional calculated using DMol<sup>3</sup>.

Table S20. Ethene hydration coordinates

Table S20A. Reactant coordinates

|   |   |          |        |        |
|---|---|----------|--------|--------|
| 1 | C | -1.072   | -0.136 | 0.500  |
| 2 | H | -1.675   | 0.719  | 0.186  |
| 3 | H | -1.388   | -1.115 | 0.132  |
| 4 | C | -0.00779 | 0.0064 | 1.300  |
| 5 | H | 0.306    | 0.985  | 1.672  |
| 6 | H | 0.591    | -0.851 | 1.617  |
| 7 | H | 0.745    | -0.091 | -1.119 |

|   |   |       |        |        |
|---|---|-------|--------|--------|
| 8 | O | 1.214 | -0.208 | -1.966 |
| 9 | H | 1.288 | 0.692  | -2.322 |

Table S20B. Transition state coordinates

|   |   |        |         |         |
|---|---|--------|---------|---------|
| 1 | C | -0.717 | -0.123  | -0.109  |
| 2 | H | -1.241 | 0.754   | -0.496  |
| 3 | H | -1.149 | -1.078  | -0.409  |
| 4 | C | 0.125  | -0.0188 | 1.031   |
| 5 | H | 0.178  | 0.942   | 1.549   |
| 6 | H | 0.279  | -0.905  | 1.651   |
| 7 | H | 0.997  | -0.041  | -0.0899 |
| 8 | O | 0.724  | -0.193  | -1.329  |
| 9 | H | 0.805  | 0.663   | -1.799  |

Table S20C. Photohydrate product coordinates

|   |   |        |         |        |
|---|---|--------|---------|--------|
| 1 | C | -0.289 | -0.0627 | -0.458 |
| 2 | H | -1.231 | 0.503   | -0.591 |
| 3 | H | -0.455 | -1.086  | -0.842 |
| 4 | C | 0.0822 | -0.113  | 1.011  |
| 5 | H | 0.232  | 0.901   | 1.406  |
| 6 | H | -0.713 | -0.600  | 1.594  |
| 7 | H | 1.015  | -0.678  | 1.153  |
| 8 | O | 0.787  | 0.576   | -1.164 |
| 9 | H | 0.571  | 0.559   | -2.111 |

Table S21. Ethene photohydrate wave numbers ( $\text{cm}^{-1}$ )

| Initial | Saddle  | Final  |
|---------|---------|--------|
| 0       | -1843.5 | 0      |
| 0       | 0       | 0      |
| 0       | 0       | 0      |
| 0       | 0       | 0      |
| 0       | 0       | 0      |
| 0       | 0       | 0      |
| 107.4   | 0       | 277.7  |
| 184.3   | 375     | 326.4  |
| 197.6   | 440.6   | 409.5  |
| 215.9   | 536.3   | 786.5  |
| 369.8   | 624.8   | 880.7  |
| 410.1   | 723.6   | 1009.9 |

|        |        |        |
|--------|--------|--------|
| 879.1  | 821.1  | 1074.5 |
| 1008.9 | 860.9  | 1138.9 |
| 1019.9 | 987.7  | 1244.3 |
| 1097.3 | 1080.4 | 1265.6 |
| 1241.2 | 1206.1 | 1359.9 |
| 1359.5 | 1216.6 | 1412.1 |
| 1471.5 | 1376.5 | 1444.1 |
| 1634.5 | 1423.2 | 1467.8 |
| 1651.6 | 1492.2 | 1471.9 |
| 3154.7 | 1544.3 | 2938.9 |
| 3165.9 | 3090.6 | 3008.5 |
| 3244.7 | 3114.4 | 3018.7 |
| 3268.7 | 3180.2 | 3093.8 |
| 3652.8 | 3220.4 | 3126.7 |
| 3802.9 | 3651.6 | 3743.1 |

## 7.1 Comparison calculations and validation for ethene + H<sub>2</sub>O

Table S22. Total energies of the reactant, transition state and product of the ethene + H<sub>2</sub>O system in Hartrees.

| <b>Ethene</b> | <b>PBE</b>  | <b>M062x</b> | <b>CCSD</b> | <b>EOMCCSD</b> | <b>CCSD(T)</b> |
|---------------|-------------|--------------|-------------|----------------|----------------|
| Reactant      | -154.889418 | -154.989080  | -154.658842 | -154.658377    | -154.675752    |
| Transition    | -154.815877 | -154.896507  | -154.555140 | -154.555141    | -154.578195    |
| Product       | -154.913455 | -155.012620  | -154.678573 | -154.678455    | -154.694915    |

## 7.2 Equation of Motion CCSD output for ethene + H<sub>2</sub>O

The EOM CCSD transition properties are given for the reactant, saddle point and product of the ethene + H<sub>2</sub>O system. The lowest root is 7.9 eV, 4.2 eV and 6.9 eV for the three respective structures. This shows that the ground state saddle point is not near a degeneracy or curve crossing with the excited state.

### 7.2.1 Reactant

Excitation energies and oscillator strengths:

```

-----
Excited State  1:      Singlet-A      7.9032 eV  156.88 nm  f=?
Right Eigenvector
Alpha Singles Amplitudes
   I   SymI   A   SymA   Value
   13    1   14    1  -0.638943
   13    1   20    1   0.179651
   13    1   21    1   0.117731
Beta  Singles Amplitudes

```

| I  | SymI | A  | SymA | Value     |
|----|------|----|------|-----------|
| 13 | 1    | 14 | 1    | -0.638943 |
| 13 | 1    | 20 | 1    | 0.179651  |
| 13 | 1    | 21 | 1    | 0.117731  |

Total Energy, E(EOM-CCSD) = -154.368406521

-----

Excited State 2: Singlet-A 8.0272 eV 154.45 nm f=?

Right Eigenvector

Alpha Singles Amplitudes

| I  | SymI | A  | SymA | Value     |
|----|------|----|------|-----------|
| 12 | 1    | 14 | 1    | -0.331298 |
| 12 | 1    | 18 | 1    | 0.376128  |
| 12 | 1    | 20 | 1    | 0.183565  |
| 12 | 1    | 21 | 1    | -0.269355 |
| 12 | 1    | 28 | 1    | -0.107135 |
| 13 | 1    | 16 | 1    | -0.252019 |

Beta Singles Amplitudes

| I  | SymI | A  | SymA | Value     |
|----|------|----|------|-----------|
| 12 | 1    | 14 | 1    | -0.331298 |
| 12 | 1    | 18 | 1    | 0.376128  |
| 12 | 1    | 20 | 1    | 0.183565  |
| 12 | 1    | 21 | 1    | -0.269355 |
| 12 | 1    | 28 | 1    | -0.107135 |
| 13 | 1    | 16 | 1    | -0.252019 |

-----

Excited State 3: Singlet-A 8.2406 eV 150.45 nm f=?

Right Eigenvector

Alpha Singles Amplitudes

| I  | SymI | A  | SymA | Value     |
|----|------|----|------|-----------|
| 12 | 1    | 14 | 1    | 0.163816  |
| 12 | 1    | 18 | 1    | -0.188151 |
| 12 | 1    | 21 | 1    | 0.147746  |
| 13 | 1    | 16 | 1    | -0.571379 |
| 13 | 1    | 23 | 1    | 0.155019  |

Beta Singles Amplitudes

| I  | SymI | A  | SymA | Value     |
|----|------|----|------|-----------|
| 12 | 1    | 14 | 1    | 0.163816  |
| 12 | 1    | 18 | 1    | -0.188151 |
| 12 | 1    | 21 | 1    | 0.147746  |
| 13 | 1    | 16 | 1    | -0.571379 |
| 13 | 1    | 23 | 1    | 0.155019  |

## 7.2.2 Saddle point

Excitation energies and oscillator strengths:

-----  
Excited State 1: Singlet-A 4.2211 eV 293.72 nm f=?

Right Eigenvector

Alpha Singles Amplitudes

| I  | SymI | A  | SymA | Value     |
|----|------|----|------|-----------|
| 13 | 1    | 14 | 1    | 0.265289  |
| 13 | 1    | 15 | 1    | -0.204166 |
| 13 | 1    | 16 | 1    | 0.167834  |
| 13 | 1    | 17 | 1    | -0.238498 |
| 13 | 1    | 19 | 1    | 0.247557  |
| 13 | 1    | 21 | 1    | 0.337476  |
| 13 | 1    | 22 | 1    | -0.198093 |

Beta Singles Amplitudes

| I  | SymI | A  | SymA | Value     |
|----|------|----|------|-----------|
| 13 | 1    | 14 | 1    | 0.265289  |
| 13 | 1    | 15 | 1    | -0.204166 |
| 13 | 1    | 16 | 1    | 0.167834  |
| 13 | 1    | 17 | 1    | -0.238498 |
| 13 | 1    | 19 | 1    | 0.247557  |
| 13 | 1    | 21 | 1    | 0.337476  |
| 13 | 1    | 22 | 1    | -0.198093 |

Total Energy, E(EOM-CCSD) = -154.400016237

-----  
Excited State 2: Singlet-A 5.6076 eV 221.10 nm f=?

Right Eigenvector

Alpha Singles Amplitudes

| I  | SymI | A  | SymA | Value     |
|----|------|----|------|-----------|
| 13 | 1    | 14 | 1    | 0.477404  |
| 13 | 1    | 15 | 1    | 0.360792  |
| 13 | 1    | 16 | 1    | -0.139642 |
| 13 | 1    | 17 | 1    | 0.155125  |
| 13 | 1    | 20 | 1    | 0.142680  |

Beta Singles Amplitudes

| I  | SymI | A  | SymA | Value     |
|----|------|----|------|-----------|
| 13 | 1    | 14 | 1    | 0.477404  |
| 13 | 1    | 15 | 1    | 0.360792  |
| 13 | 1    | 16 | 1    | -0.139642 |
| 13 | 1    | 17 | 1    | 0.155125  |
| 13 | 1    | 20 | 1    | 0.142680  |



Excited State 3: Singlet-A 6.5699 eV 188.72 nm f=?

Right Eigenvector

Alpha Singles Amplitudes

| I  | SymI | A  | SymA | Value     |
|----|------|----|------|-----------|
| 13 | 1    | 15 | 1    | 0.319110  |
| 13 | 1    | 16 | 1    | 0.555092  |
| 13 | 1    | 21 | 1    | -0.117750 |

Beta Singles Amplitudes

| I  | SymI | A  | SymA | Value     |
|----|------|----|------|-----------|
| 13 | 1    | 15 | 1    | 0.319110  |
| 13 | 1    | 16 | 1    | 0.555092  |
| 13 | 1    | 21 | 1    | -0.117750 |

### 7.2.3 Product

Excitation energies and oscillator strengths:

-----  
Excited State 1: Singlet-A 6.8761 eV 180.31 nm f=?

Right Eigenvector

Alpha Singles Amplitudes

| I  | SymI | A  | SymA | Value     |
|----|------|----|------|-----------|
| 11 | 1    | 14 | 1    | 0.142842  |
| 13 | 1    | 14 | 1    | -0.540257 |
| 13 | 1    | 15 | 1    | 0.174109  |
| 13 | 1    | 16 | 1    | 0.224938  |
| 13 | 1    | 24 | 1    | 0.160516  |

Beta Singles Amplitudes

| I  | SymI | A  | SymA | Value     |
|----|------|----|------|-----------|
| 11 | 1    | 14 | 1    | 0.142842  |
| 13 | 1    | 14 | 1    | -0.540257 |
| 13 | 1    | 15 | 1    | 0.174109  |
| 13 | 1    | 16 | 1    | 0.224938  |
| 13 | 1    | 24 | 1    | 0.160516  |

Total Energy, E(EOM-CCSD) = -154.425881330

-----  
Excited State 2: Singlet-A 8.2684 eV 149.95 nm f=?

Right Eigenvector

Alpha Singles Amplitudes

| I  | SymI | A  | SymA | Value     |
|----|------|----|------|-----------|
| 13 | 1    | 14 | 1    | -0.336507 |
| 13 | 1    | 15 | 1    | -0.281470 |
| 13 | 1    | 16 | 1    | -0.398904 |

|                         |      |    |      |           |
|-------------------------|------|----|------|-----------|
| 13                      | 1    | 18 | 1    | -0.187458 |
| 13                      | 1    | 20 | 1    | -0.134165 |
| 13                      | 1    | 22 | 1    | -0.104399 |
| Beta Singles Amplitudes |      |    |      |           |
| I                       | SymI | A  | SymA | Value     |
| 13                      | 1    | 14 | 1    | -0.336507 |
| 13                      | 1    | 15 | 1    | -0.281470 |
| 13                      | 1    | 16 | 1    | -0.398904 |
| 13                      | 1    | 18 | 1    | -0.187458 |
| 13                      | 1    | 20 | 1    | -0.134165 |
| 13                      | 1    | 22 | 1    | -0.104399 |

-----

Excited State 3: Singlet-A 8.6320 eV 143.63 nm f=?

Right Eigenvector

Alpha Singles Amplitudes

| I  | SymI | A  | SymA | Value     |
|----|------|----|------|-----------|
| 13 | 1    | 15 | 1    | -0.442262 |
| 13 | 1    | 16 | 1    | 0.373041  |
| 13 | 1    | 20 | 1    | -0.292709 |

Beta Singles Amplitudes

| I  | SymI | A  | SymA | Value     |
|----|------|----|------|-----------|
| 13 | 1    | 15 | 1    | -0.442262 |
| 13 | 1    | 16 | 1    | 0.373041  |
| 13 | 1    | 20 | 1    | -0.292709 |

## 8.0 Trans-thymine photohydration

The trans photohydration mechanism was studied using 1-methylthymine and H<sub>2</sub>O. The transition state involved breaking a C-C bond in the ring to provide a route for the H atom to pass to the opposite side of the ring from the attacking H<sub>2</sub>O. However, the barrier for this process was significantly higher than the other models studied. The NEB calculation for the photohydration reaction of thymine with trans addition to the C5-C6  $\pi$ -bond is shown in Figure S12. The transition state is >100 kcal/mol higher in energy than in the reactant state. This is significantly larger than the barriers for the other reactions studied, which all have <50 kcal/mol based on the calculation using the PBE functional. Therefore, this pathway was discounted and it was concluded that it plays no role in the photochemistry of thymine.

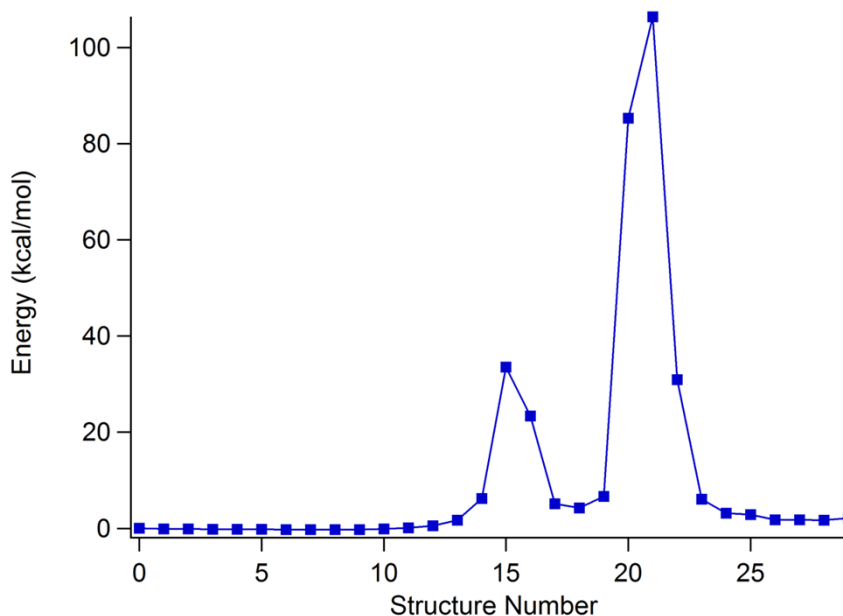

Figure S12. Ground state energy ( $S_0$ ) for the trans addition of water in the 1-MT + H<sub>2</sub>O system calculated using the NEB method.

### 9.0 Validation of the PBE functional using a numerical basis set.

We conducted comparison calculations on H<sub>2</sub>O in order to determine the quality of the PBE functional compared to other reference methods. As elsewhere in this study we have chosen the M062x hybrid functional and the CCSD calculation as references for comparison. The vibrational frequencies, bond lengths/angles and dipole moments are compared in Tables S23, S25 and S26, respectively. The percent error in the normal mode calculation is given Table S24. Of the methods used, CCSD is the most accurate for frequencies and for structure. However, the PBE method is comparable to M062x and CISD in the calculation of frequencies and the angle. Only the bond length is less accurate. Although PBE is less accurate than these other methods, the % error in the bond length is 1.34% (Table S25). Finally, the dipole moment of water was compared. PBE gives by far the best agreement with the gas phase dipole moment for H<sub>2</sub>O (Table S26).

Table S23. Comparison of vibrational wave numbers (cm<sup>-1</sup>) for the three normal modes of H<sub>2</sub>O calculated using various methods.

| Method        | PBE    | M062X  | CCSD | CISD   | Expmt |
|---------------|--------|--------|------|--------|-------|
| Bend          | 1630.6 | 1604.9 | 1658 | 1670.3 | 1654  |
| Sym. Stretch  | 3718.3 | 3906.3 | 3897 | 3949   | 3825  |
| Asym. Stretch | 3833.7 | 4013   | 3999 | 4046.1 | 3935  |

Table S24. Percent error for the three calculated normal mode of H<sub>2</sub>O.

| Method | PBE | M062X | CCSD | CISD |
|--------|-----|-------|------|------|
|        |     |       |      |      |

|               |       |       |       |       |
|---------------|-------|-------|-------|-------|
| Bend          | 1.415 | 2.969 | 0.242 | 0.985 |
| Sym. Stretch  | 2.790 | 2.125 | 1.882 | 3.242 |
| Asym. Stretch | 2.574 | 1.982 | 1.626 | 2.823 |
| Average       | 2.260 | 2.359 | 1.250 | 2.350 |

Table S25. Calculated bond lengths and angles using various methods.

| Method             | PBE   | M062x | CCSD  | CISD  | Experiment |
|--------------------|-------|-------|-------|-------|------------|
| $\delta$ (Å)       | 0.970 | 0.959 | 0.958 | 0.955 | 0.9572     |
| %Error in $\delta$ | 1.34  | 0.19  | 0.084 | 0.23  | - - -      |
| $\theta$ (degrees) | 103.7 | 105.0 | 103.7 | 103.9 | 104.5      |
| %Error in $\theta$ | 0.77  | 0.48  | 0.77  | 0.57  | - - - -    |

Table S26. Calculated dipole moment using various methods.

| Method        | PBE   | M062x | CCSD  | CISD  | Experiment |
|---------------|-------|-------|-------|-------|------------|
| $\mu$ (Debye) | 1.905 | 2.172 | 2.352 | 2.246 | 1.86       |
| %Error        | 2.42  | 16.8  | 26.5  | 20.8  | - - -      |

## 10.0 Mulliken and Electrostatic Potential Fitting Charge Analysis

In the text we presented an analysis of the change the nuclear charge in the transition state relative to the reactant and product states based electrostatic potential (ESP) fitting. The Mulliken charge is another method for partitioning charge. Since the assignment of nuclear charge is not unique, it is worthwhile to compare the conclusion of different methods in order ensure that the conclusion reached is robust. Indeed, the analysis using the Mulliken charge set leads one to the same conclusion as the ESP fitting, namely that there is a polarization of the  $\pi$ -bond between C5 and C6 in all of the pyrimidines.

The Mulliken charges for the initial, saddle point and final structures are presented in Tables S27, S28 and S29 for 1-MU, 1-MT and 1-MC, respectively. The polarization of the C5-C6 bond is observed for each of the species studied. The C5 carbon acquires a significant negative charge in the transition state relative to the initial state. The shift in Mulliken charge is -0.225, -0.263 and -0.188 for 1-MU, 1-MT and 1-MC, respectively. The C6 carbon is shifted to more positive values of the Mulliken charge in the transition state by 0.094, 0.117 and 0.090 for 1-MU, 1-MT and 1-MC, respectively. In all cases, the shift in C6 is about half as large as the shift in C5. Aside from the hydrogen atoms H5 and H6, the next largest shift in Mulliken charge is on C4. However, this is less than 0.040 in all cases.

The electrostatic potential fitted charge sets for the three pyrimidines are given in Tables S30 - S32.

Similar trends are observed to those obtained using Mulliken charge.

Table S27. Mulliken charges for 1-MU

| Atom    | Saddle | Initial | Final  | Type | I - S  | F - S  |
|---------|--------|---------|--------|------|--------|--------|
| H ( 1)  | 0.119  | 0.125   | 0.114  | Hm   | 0.006  | -0.005 |
| H ( 2)  | 0.102  | 0.139   | 0.143  | Hm   | 0.037  | 0.041  |
| H ( 2)  | 0.161  | 0.167   | 0.161  | Hm   | 0.006  | 0      |
| C ( 4)  | -0.221 | -0.201  | -0.19  | Cm   | 0.02   | 0.031  |
| N ( 5)  | -0.297 | -0.293  | -0.354 | N1   | 0.004  | -0.057 |
| C ( 6)  | 0.542  | 0.55    | 0.56   | C2   | 0.008  | 0.018  |
| O ( 7)  | -0.458 | -0.437  | -0.458 | O2   | 0.021  | 0      |
| N ( 8)  | -0.324 | -0.325  | -0.307 | N3   | -0.001 | 0.017  |
| H ( 9)  | 0.213  | 0.216   | 0.211  | H3   | 0.003  | -0.002 |
| C ( 10) | 0.417  | 0.455   | 0.445  | C4   | 0.038  | 0.028  |
| O ( 11) | -0.436 | -0.423  | -0.412 | O4   | 0.013  | 0.024  |
| C ( 12) | -0.197 | -0.422  | -0.285 | C5   | -0.225 | -0.088 |
| H ( 13) | 0.154  | 0.126   | 0.094  | H5   | -0.028 | -0.060 |
| C ( 14) | 0.114  | 0.208   | 0.244  | C6   | 0.094  | 0.130  |
| H ( 15) | 0.099  | 0.13    | 0.088  | H6   | 0.031  | -0.011 |
| O ( 16) | -0.539 | -0.586  | -0.481 | Ow   | -0.047 | 0.058  |
| H ( 17) | 0.278  | 0.263   | 0.269  | Hw_6 | -0.015 | -0.009 |
| H ( 18) | 0.274  | 0.309   | 0.158  | Hw_5 | 0.035  | -0.116 |

Table S28. Mulliken charges for 1-MT

|         |        |        |        |     |        |        |
|---------|--------|--------|--------|-----|--------|--------|
| H ( 1)  | 0.117  | 0.124  | 0.111  | Hm  | 0.007  | -0.006 |
| H ( 2)  | 0.151  | 0.126  | 0.097  | Hm  | -0.025 | -0.054 |
| H ( 3)  | 0.16   | 0.166  | 0.157  | Hm  | 0.006  | -0.003 |
| C ( 4)  | -0.22  | -0.199 | -0.186 | Cm  | 0.021  | 0.034  |
| N ( 5)  | -0.293 | -0.287 | -0.357 | N1  | 0.006  | -0.064 |
| C ( 6)  | 0.534  | 0.546  | 0.557  | C2  | 0.012  | 0.023  |
| O ( 7)  | -0.464 | -0.438 | -0.459 | O2  | 0.026  | 0.005  |
| N ( 8)  | -0.319 | -0.322 | -0.307 | N3  | -0.003 | 0.012  |
| H ( 9)  | 0.211  | 0.215  | 0.209  | H3  | 0.004  | -0.002 |
| C ( 10) | 0.424  | 0.467  | 0.466  | C4  | 0.043  | 0.042  |
| O ( 11) | -0.447 | -0.432 | -0.416 | O4  | 0.015  | 0.031  |
| C ( 12) | -0.083 | -0.346 | -0.231 | C5  | -0.263 | -0.148 |
| C ( 13) | 0.092  | 0.209  | 0.267  | C6  | 0.117  | 0.175  |
| H ( 14) | 0.092  | 0.126  | 0.082  | H6  | 0.034  | -0.01  |
| C ( 15) | -0.33  | -0.289 | -0.285 | C5m | 0.041  | 0.045  |

|         |        |        |       |      |        |        |
|---------|--------|--------|-------|------|--------|--------|
| H ( 16) | 0.145  | 0.141  | 0.135 | H5m  | -0.004 | -0.01  |
| H ( 17) | 0.102  | 0.111  | 0.109 | H5m  | 0.009  | 0.007  |
| H ( 18) | 0.114  | 0.102  | 0.115 | H5m  | -0.012 | -0.006 |
| O ( 19) | -0.539 | -0.595 | -0.48 | Ow   | -0.056 | 0.059  |
| H ( 20) | 0.278  | 0.259  | 0.268 | Hw_6 | -0.019 | -0.01  |
| H ( 21) | 0.274  | 0.313  | 0.146 | Hw_5 | 0.039  | -0.128 |

Table S29. Mulliken charges for 1-MC

| Atom    | Saddle | Initial | Final  | Type | I - S  | F - S  |
|---------|--------|---------|--------|------|--------|--------|
| H ( 1)  | 0.114  | 0.112   | 0.101  | Hm   | -0.002 | -0.013 |
| H ( 2)  | 0.127  | 0.118   | 0.085  | Hm   | -0.009 | -0.042 |
| H ( 3)  | 0.166  | 0.163   | 0.157  | Hm   | -0.003 | -0.009 |
| C ( 4)  | -0.21  | -0.19   | -0.184 | Cm   | 0.02   | 0.026  |
| N ( 5)  | -0.297 | -0.288  | -0.362 | N1   | 0.009  | -0.065 |
| C ( 6)  | 0.465  | 0.474   | 0.492  | C2   | 0.009  | 0.027  |
| O ( 7)  | -0.545 | -0.617  | -0.497 | O2   | -0.072 | 0.048  |
| N ( 8)  | -0.329 | -0.328  | -0.309 | N3   | 0.001  | 0.02   |
| C ( 9)  | 0.273  | 0.309   | 0.277  | C4   | 0.036  | 0.004  |
| C ( 10) | -0.228 | -0.416  | -0.275 | C5   | -0.188 | -0.047 |
| H ( 11) | 0.08   | 0.119   | 0.144  | H5   | 0.039  | 0.064  |
| C ( 12) | 0.117  | 0.207   | 0.259  | C6   | 0.090  | 0.142  |
| H ( 13) | 0.277  | 0.259   | 0.268  | H6   | -0.018 | -0.009 |
| N ( 14) | -0.336 | -0.32   | -0.322 | Nam  | 0.016  | 0.014  |
| H ( 15) | 0.207  | 0.21    | 0.209  | Ham  | 0.003  | 0.002  |
| H ( 16) | 0.196  | 0.203   | 0.2    | Ham  | 0.007  | 0.004  |
| O ( 17) | -0.455 | -0.427  | -0.448 | Ow   | 0.028  | 0.007  |
| H ( 18) | 0.101  | 0.118   | 0.077  | Hw_6 | 0.017  | -0.024 |
| H ( 19) | 0.277  | 0.295   | 0.128  | Hw_5 | 0.018  | -0.149 |

Table S30. Electrostatic potential fitted charges for 1-MU

|   |        |        |        |    |        |        |
|---|--------|--------|--------|----|--------|--------|
| H | 0.167  | 0.152  | 0.179  | Hm | 0.015  | 0.027  |
| H | 0.224  | 0.263  | 0.174  | H5 | -0.039 | -0.089 |
| H | 0.239  | 0.175  | 0.182  | Hm | 0.064  | 0.007  |
| C | -0.591 | -0.446 | -0.556 | Cm | -0.145 | -0.11  |
| H | 0.222  | 0.209  | 0.226  | Hm | 0.013  | 0.017  |
| N | 0.147  | -0.156 | -0.205 | N1 | 0.303  | -0.049 |
| C | -0.086 | 0.336  | 0.415  | C6 | -0.422 | 0.079  |
| O | -0.760 | -0.730 | -0.576 | Ow | -0.03  | 0.154  |
| C | 0.598  | 0.723  | 0.720  | C2 | -0.125 | -0.003 |
| O | -0.530 | -0.527 | -0.532 | O2 | -0.003 | -0.005 |
| N | -0.624 | -0.634 | -0.726 | N3 | 0.010  | -0.092 |
| H | 0.372  | 0.364  | 0.384  | H3 | 0.008  | 0.02   |

|   |        |        |        |      |        |        |
|---|--------|--------|--------|------|--------|--------|
| C | 0.713  | 0.699  | 0.833  | C4   | 0.014  | 0.134  |
| O | -0.538 | -0.506 | -0.543 | O4   | -0.032 | -0.037 |
| C | -0.511 | -0.801 | -0.628 | C5   | 0.290  | 0.173  |
| H | 0.373  | 0.386  | 0.381  | Hw_6 | -0.013 | -0.005 |
| H | 0.202  | 0.156  | 0.052  | H6   | 0.046  | -0.104 |
| H | 0.381  | 0.336  | 0.220  | Hw_5 | 0.045  | -0.116 |

Table S31. Electrostatic potential fitted charges for 1-MT

|   |        |        |        |      |        |        |
|---|--------|--------|--------|------|--------|--------|
| H | 0.237  | 0.136  | 0.172  | Hm   | 0.101  | 0.036  |
| H | -0.889 | 0.260  | -0.565 | H5   | -1.149 | -0.825 |
| H | 0.317  | 0.163  | 0.18   | Hm   | 0.154  | 0.017  |
| C | -0.859 | -0.404 | -0.557 | Cm   | -0.455 | -0.153 |
| H | 0.281  | 0.194  | 0.219  | Hm   | 0.087  | 0.025  |
| N | 0.329  | -0.273 | -0.088 | N1   | 0.602  | 0.185  |
| C | -0.499 | 0.432  | 0.189  | C6   | -0.931 | -0.243 |
| O | -0.823 | -0.491 | -0.625 | Ow   | -0.332 | -0.134 |
| C | 0.568  | 0.703  | 0.628  | C2   | -0.135 | -0.075 |
| O | -0.537 | -0.525 | -0.524 | O2   | -0.012 | 0.001  |
| N | -0.670 | -0.664 | -0.613 | N3   | -0.006 | 0.051  |
| H | 0.406  | 0.419  | 0.365  | H3   | -0.013 | -0.054 |
| C | 0.530  | 0.464  | 0.660  | C4   | 0.066  | 0.196  |
| O | -0.509 | -0.381 | -0.526 | O4   | -0.128 | -0.145 |
| C | 0.260  | -0.674 | -0.037 | C5   | 0.934  | 0.637  |
| H | 0.403  | 0.390  | 0.417  | Hw_5 | 0.013  | 0.027  |
| H | 0.299  | 0.103  | 0.090  | Hw_6 | 0.196  | -0.013 |
| C | 0.409  | -0.307 | 0.126  | C5m  | 0.716  | 0.433  |
| H | 0.257  | 0.090  | 0.182  | H5m  | 0.167  | 0.092  |
| H | 0.243  | 0.153  | 0.163  | H5m  | 0.09   | 0.01   |
| H | 0.249  | 0.211  | 0.144  | H5m  | 0.038  | -0.067 |

Table S32. Electrostatic potential fitted charges for 1-MC

|   |        |        |        |    |        |        |
|---|--------|--------|--------|----|--------|--------|
| H | 0.165  | 0.154  | 0.161  | Hm | 0.011  | 0.007  |
| H | 0.245  | 0.271  | 0.171  | H5 | -0.026 | -0.1   |
| H | 0.212  | 0.183  | 0.169  | Hm | 0.029  | -0.014 |
| C | -0.564 | -0.474 | -0.517 | Cm | -0.09  | -0.043 |
| H | 0.215  | 0.21   | 0.209  | Hm | 0.005  | -0.001 |
| N | 0.085  | -0.22  | -0.277 | N1 | 0.305  | -0.057 |
| C | -0.028 | 0.331  | 0.367  | C6 | -0.359 | 0.036  |
| O | -0.724 | -0.747 | -0.627 | Ow | 0.023  | 0.12   |
| C | 0.766  | 0.923  | 0.862  | C2 | -0.157 | -0.061 |
| O | -0.579 | -0.564 | -0.556 | O2 | -0.015 | 0.008  |

|   |        |        |        |      |        |        |
|---|--------|--------|--------|------|--------|--------|
| N | -0.746 | -0.825 | -0.811 | N3   | 0.079  | 0.014  |
| C | 0.739  | 0.841  | 0.893  | C4   | -0.102 | 0.052  |
| N | -0.790 | -0.888 | -0.929 | Nam  | 0.098  | -0.041 |
| C | -0.619 | -0.857 | -0.616 | C5   | 0.238  | 0.241  |
| H | 0.352  | 0.375  | 0.406  | Hw_6 | -0.023 | 0.031  |
| H | 0.177  | 0.158  | 0.065  | H6   | 0.019  | -0.093 |
| H | 0.364  | 0.312  | 0.212  | Hw_5 | 0.052  | -0.1   |
| H | 0.374  | 0.419  | 0.421  | Ham  | -0.045 | 0.002  |
| H | 0.354  | 0.398  | 0.395  | Ham  | -0.044 | -0.003 |
